# Supplementary material for: Binuclear cyclooctatetraene–iron carbonyl complexes: examples of fluxionality and valence tautomerism
Source: Royal Society of Chemistry journal article supplement (doi:10.1039/c5nj02307f), 2015-11-30
Supplement: c5nj02307f1.pdf [file c5nj02307f1.pdf]

# Binuclear Cyclooctatetraene-Iron Carbonyl Complexes: Examples of Fluxionality and Valence Tautomerism

Hongyan Wang,<sup>a,b,c\*</sup> Songsong Sun,<sup>a,b</sup> Hui Wang,<sup>a,b</sup> and R. Bruce King<sup>c\*</sup>

<sup>a</sup>*School of Physical Science and Technology, Southwest Jiaotong University,*

<sup>b</sup>*Key Laboratory of Advanced Technologies of Materials, Ministry of Education of China,*

*Chengdu 610031, China*

<sup>c</sup>*Department of Chemistry and the Center for Computational Quantum Chemistry,  
University of Georgia, Athens, Georgia 30602, USA*

E-mail: [wanghyxx@yahoo.com](mailto:wanghyxx@yahoo.com); [rbking@chem.uga.edu](mailto:rbking@chem.uga.edu)

## Supplementary Material

1. Complete Gaussian reference
2. Higher energy optimized  $C_8H_8Fe_2(CO)_n$  structures(Figures S1);
3. Energies, relative energies, and iron-iron distances for the  $(C_8H_8)Fe_2(CO)_n$  ( $n = 8, 7, 6, 5, 4, 3$ ) structures by the M06L, B3LYP and BP86 methods(Table S1);
4. Complete tables of iron-carbon and carbon-carbon distances (in Å) for the  $(C_8H_8)Fe_2(CO)_n$  ( $n = 8, 7, 6, 5, 4, 3$ ) structures by the M06L, B3LYP and BP86 methods(Table S2);
5. Coordinates of the optimized  $(C_8H_8)Fe_2(CO)_n$  ( $n = 8, 7, 6, 5, 4, 3$ ) structures (Table S3) by the M06L method;
6. Harmonic vibrational frequencies of the  $(C_8H_8)Fe_2(CO)_n$  ( $n = 8, 7, 6, 5, 4, 3$ ) structures (Table S4) by the M06Lmethod.

## 1. Complete Gaussian reference (reference 28).

Gaussian 09, Revision A.1, M. J. Frisch, G. W. Trucks, H. B. Schlegel, G. E. Scuseria, M. A. Robb, J. R. Cheeseman, G. Scalmani, V. Barone, B. Mennucci, G. A. Petersson, H. Nakatsuji, M. Caricato, X. Li, H. P. Hratchian, A. F. Izmaylov, J. Bloino, G. Zheng, J. L. Sonnenberg, M. Hada, M. Ehara, K. Toyota, R. Fukuda, J. Hasegawa, M. Ishida, T. Nakajima, Y. Honda, O. Kitao, H. Nakai, T. Vreven, J. A. Montgomery, Jr., J. E. Peralta, F. Ogliaro, M. Bearpark, J. J. Heyd, E. Brothers, K. N. Kudin, V. N. Staroverov, R. Kobayashi, J. Normand, K. Raghavachari, A. Rendell, J. C. Burant, S. S. Iyengar, J. Tomasi, M. Cossi, N. Rega, J. M. Millam, M. Klene, J. E. Knox, J. B. Cross, V. Bakken, C. Adamo, J. Jaramillo, R. Gomperts, R. E. Stratmann, O. Yazyev, A. J. Austin, R. Cammi, C. Pomelli, J. W. Ochterski, R. L. Martin, K. Morokuma, V. G. Zakrzewski, G. A. Voth, P. Salvador, J. J. Dannenberg, S. Dapprich, A. D. Daniels, O. Farkas, J. B. Foresman, J. V. Ortiz, J. Cioslowski, and D. J. Fox, Gaussian, Inc., Wallingford CT, 2009.

Figures S1: Higher energy optimized  $C_8H_8Fe_2(CO)_n$  ( $n=8, 7, 6, 5, 3$ ) structures

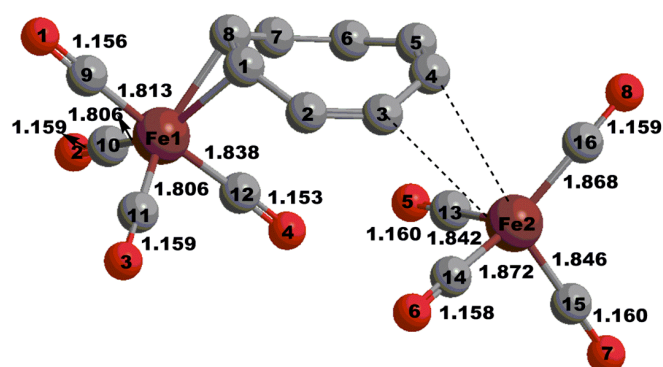

8-cis-T( $C_1$ ,13.7)

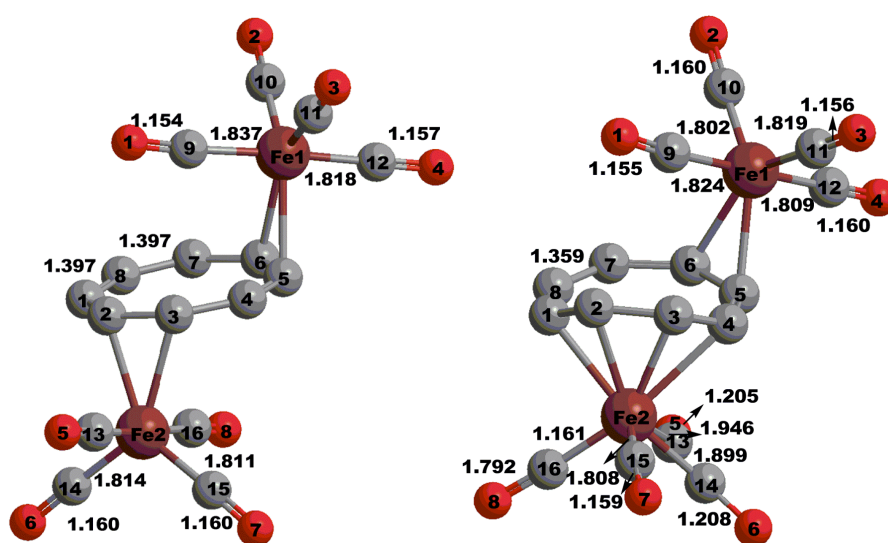

8-trans-T( $C_2$ ,14.8)

8-trans-S( $C_1$ ,44.8)

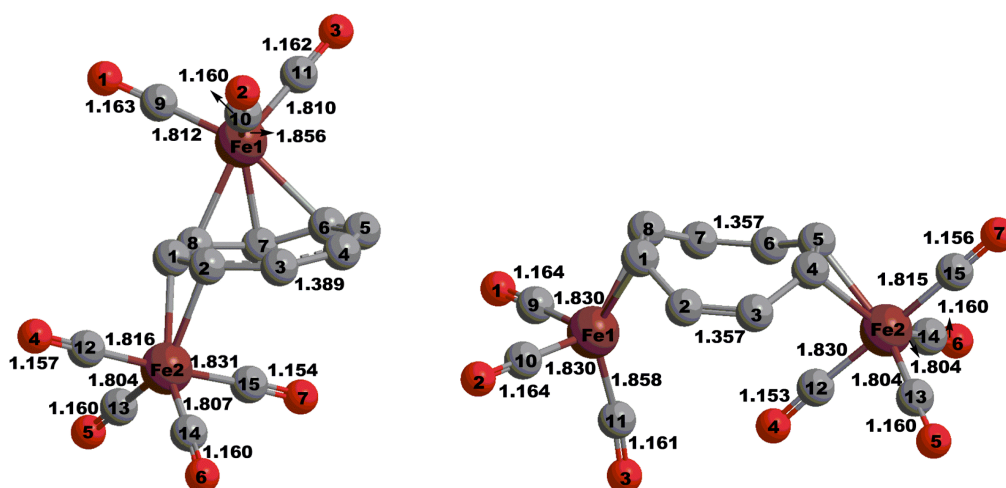

7-trans-T( $C_1$ ,15.6)

7-cis-T( $C_1$ ,21.3)

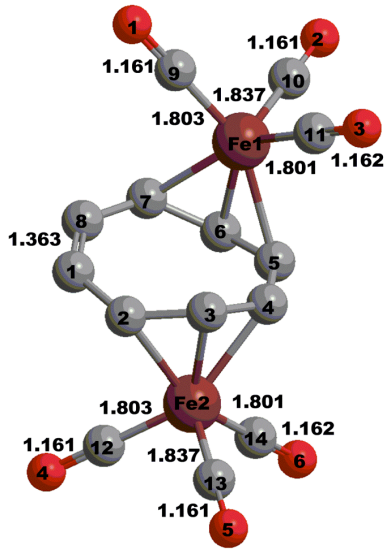

6-trans-T( $C_2$ , 14.8)

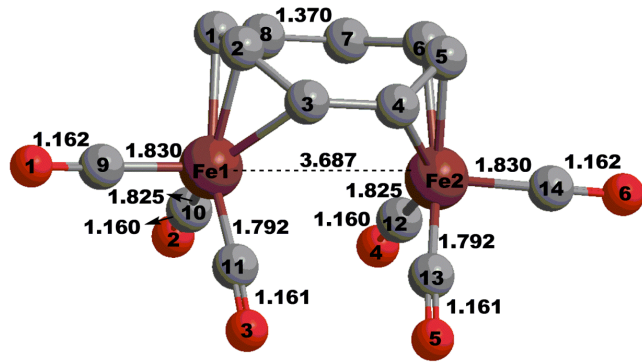

6-cis-T( $C_s$ , 17.5)

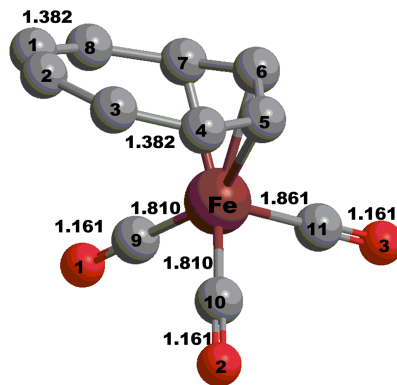

$C_8H_8Fe(CO)_3$ -T( $C_s$ , 20.9)

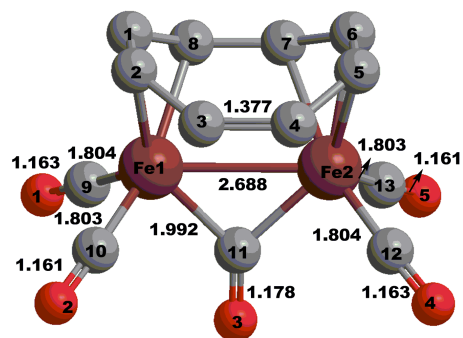

5-cis-T ( $C_{2v}$ , 20.9)

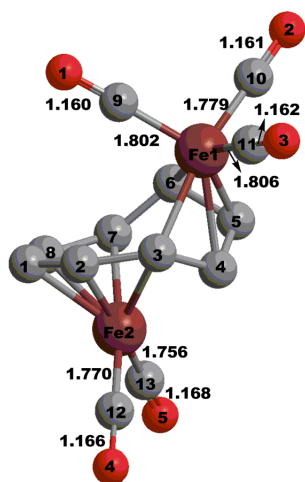

5-trans-S (C1, 21.2)

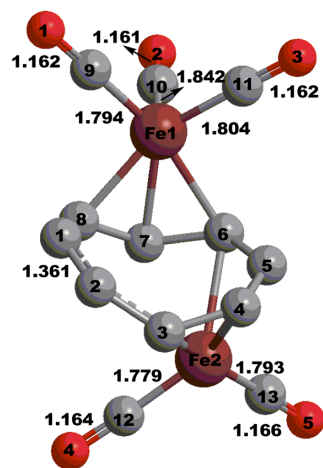

5-trans-T (C1, 20.9)

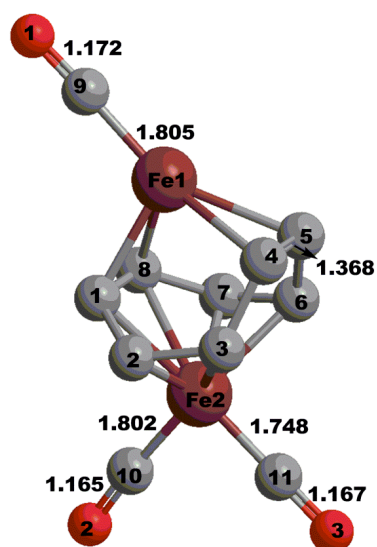

3-trans-T(C<sub>1</sub>,28.4)

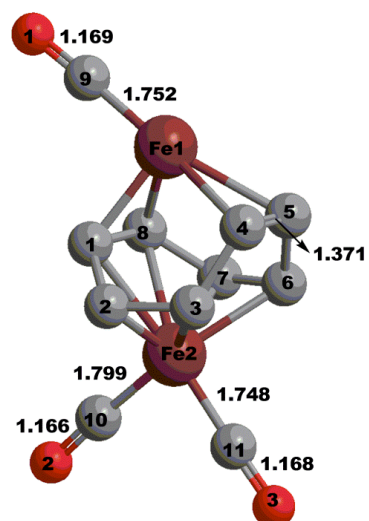

3-trans-S(C<sub>1</sub>,42.0)

**Table S1.** Energies, relative energies, and metal-metal distances for the  $(C_8H_8)Fe_2(CO)_n$  ( $n = 8,7,6,5,4,3$ ) the M06L, B3LYP and BP86 method.

|                       | $C_8H_8Fe(CO)_3-S(C_{2v})$ |            |            | $C_8H_8Fe(CO)_3-T(C_s)$ |            |            |
|-----------------------|----------------------------|------------|------------|-------------------------|------------|------------|
|                       | M06L                       | B3LYP      | BP86       | M06L                    | B3LYP      | BP86       |
| -E                    | 1913.38970                 | 1913.49619 | 1913.74339 | 1913.35305              | 1913.46922 | 1913.70095 |
| ZPE                   | 0.16073                    | 0.16097    | 0.15638    | 0.15736                 | 0.15755    | 0.15379    |
| $\Delta E$            | 0.00                       | 0.00       | 0.00       | 23.00                   | 16.92      | 26.63      |
| $\Delta E(ZPE)$       | 0.00                       | 0.00       | 0.00       | 20.88                   | 14.78      | 25.01      |
| $\langle S^2 \rangle$ | ---                        | ---        | ---        | 2.1                     | 2.1        | 2.0        |

|                       | 8-cis- $S(C_{2v})$ |            |            | 8-trans- $S(C_1)$ |            |            |
|-----------------------|--------------------|------------|------------|-------------------|------------|------------|
|                       | M06L               | B3LYP      | BP86       | M06L              | B3LYP      | BP86       |
| $Fe_1-Fe_2$           | 6.427              | 6.496      | 6.478      | ---               | ---        | ---        |
| -E                    | 3743.85752         | 3744.05559 | 3744.55795 | 3743.78753        | 3743.96477 | 3744.48986 |
| ZPE                   | 0.20208            | 0.20330    | 0.19764    | 0.20349           | 0.20399    | 0.19819    |
| $\Delta E$            | 0.00               | 0.00       | 0.00       | 43.92             | 56.99      | 42.73      |
| $\Delta E(ZPE)$       | 0.00               | 0.00       | 0.00       | 44.80             | 57.42      | 43.07      |
|                       | 8-cis- $T(C_1)$    |            |            | 8-trans- $T(C_2)$ |            |            |
|                       | M06L               | B3LYP      | BP86       | M06L              | B3LYP      | BP86       |
| $Fe_1-Fe_2$           | 6.478              | 6.807      | 7.463      | ---               | ---        | ---        |
| -E                    | 3743.83365         | 3744.03832 | 3744.51716 | 3743.83184        | 3744.02682 | 3744.52616 |
| ZPE                   | 0.20003            | 0.19949    | 0.19496    | 0.19998           | 0.20030    | 0.19573    |
| $\Delta E$            | 14.98              | 10.84      | 25.60      | 16.11             | 18.05      | 19.95      |
| $\Delta E(ZPE)$       | 13.69              | 8.45       | 23.91      | 14.80             | 16.17      | 18.75      |
| $\langle S^2 \rangle$ | 2.1                | 2.0        | 2.0        | 2.1               | 2.1        | 2.1        |

|                       | 7-cis- $S(C_1)$ |            |            | 7-trans- $S(C_1)$ |            |            |
|-----------------------|-----------------|------------|------------|-------------------|------------|------------|
|                       | M06L            | B3LYP      | BP86       | M06L              | B3LYP      | BP86       |
| $Fe_1-Fe_2$           | 4.755           | 4.859      | 4.832      | ---               | ---        | ---        |
| -E                    | 3630.51570      | 3630.69799 | 3631.19999 | 3630.53084        | 3630.71278 | 3631.21538 |
| ZPE                   | 0.19531         | 0.19601    | 0.19072    | 0.19569           | 0.19642    | 0.19108    |
| $\Delta E$            | 9.50            | 9.28       | 9.66       | 0.00              | 0.00       | 0.00       |
| $\Delta E(ZPE)$       | 9.26            | 9.02       | 9.43       | 0.00              | 0.00       | 0.00       |
|                       | 7-cis- $T(C_s)$ |            |            | 7-trans- $T(C_1)$ |            |            |
|                       | M06L            | B3LYP      | BP86       | M06L              | B3LYP      | BP86       |
| $Fe_1-Fe_2$           | 5.623           | 5.871      | 5.871      | ---               | ---        | ---        |
| -E                    | 3630.49296      | 3630.68833 | 3631.16960 | 3630.50270        | 3630.69171 | 3631.17970 |
| ZPE                   | 0.19167         | 0.19238    | 0.18744    | 0.19248           | 0.19264    | 0.18839    |
| $\Delta E$            | 23.77           | 15.34      | 28.73      | 17.66             | 13.22      | 22.39      |
| $\Delta E(ZPE)$       | 21.25           | 12.81      | 26.44      | 15.64             | 10.85      | 20.70      |
| $\langle S^2 \rangle$ | 2.1             | 2.1        | 2.0        | 2.1               | 2.1        | 2.0        |

|                                  | 6-cis-S(C <sub>s</sub> ) |            |            | 6-trans-S(C <sub>i</sub> ) |            |            |
|----------------------------------|--------------------------|------------|------------|----------------------------|------------|------------|
|                                  | M06L                     | B3LYP      | BP86       | M06L                       | B3LYP      | BP86       |
| Fe <sub>1</sub> -Fe <sub>2</sub> | 2.990                    | 3.084      | 3.041      | ---                        | ---        | ---        |
| -E                               | 3517.17731               | 3517.34287 | 3517.84548 | 3517.19393                 | 3517.36109 | 3517.86077 |
| ZPE                              | 0.18831                  | 0.18876    | 0.18355    | 0.18838                    | 0.18888    | 0.18377    |
| ΔE                               | 10.43                    | 11.43      | 9.59       | 0.00                       | 0.00       | 0.00       |
| ΔE(ZPE)                          | 10.39                    | 11.36      | 9.46       | 0.00                       | 0.00       | 0.00       |
|                                  | 6-cis-T(C <sub>s</sub> ) |            |            | 6-trans-T(C <sub>2</sub> ) |            |            |
|                                  | M06L                     | B3LYP      | BP86       | M06L                       | B3LYP      | BP86       |
| Fe <sub>1</sub> -Fe <sub>2</sub> | 3.687                    | 3.846      | 3.837      | ---                        | ---        | ---        |
| -E                               | 3517.16277               | 3517.34255 | 3517.82393 | 3517.16731                 | 3517.35151 | 3517.83089 |
| ZPE                              | 0.18506                  | 0.18537    | 0.18080    | 0.18535                    | 0.18574    | 0.18118    |
| ΔE                               | 19.55                    | 11.63      | 23.12      | 16.70                      | 6.01       | 18.75      |
| ΔE(ZPE)                          | 17.47                    | 9.43       | 21.25      | 14.80                      | 4.04       | 17.12      |
| ⟨S <sup>2</sup> ⟩                | 2.1                      | 2.1        | 2.0        | 2.1                        | 2.1        | 2.0        |

|                                  | 5-cis-S(C <sub>2v</sub> ) |                |                | 5-cis-S'(C <sub>2v</sub> ) |                |                | 5-trans-S(C <sub>1</sub> ) |                |                 |
|----------------------------------|---------------------------|----------------|----------------|----------------------------|----------------|----------------|----------------------------|----------------|-----------------|
|                                  | M06L                      | B3LYP          | BP86           | M06L                       | B3LYP          | BP86           | M06L                       | B3LYP          | BP86            |
| Fe <sub>1</sub> -Fe <sub>2</sub> | 2.776                     | 2.814          | 2.809          | 2.739                      | 2.791          | 2.781          | ---                        | ---            | ---             |
| -E                               | 3403.8<br>4635            | 3404.0<br>0699 | 3404.50<br>246 | 3403.84<br>331             | 3404.00<br>107 | 3404.49<br>862 | 3403.80<br>500             | 3403.96<br>595 | 3404.462<br>423 |
| ZPE                              | 0.1803<br>7               | 0.1808<br>7    | 0.17605        | 0.17976                    | 0.18014        | 0.17538        | 0.17848                    | 0.17897        | 0.17415         |
| ΔE                               | 0.00                      | 0.00           | 0.00           | 1.91                       | 3.71           | 2.41           | 25.95                      | 25.75          | 25.12           |
| ΔE(ZPE)                          | 0.00                      | 0.00           | 0.00           | 24.76                      | 24.56          | 23.93          | 21.23                      | 16.53          | 24.57           |
|                                  | 5-cis-T(C <sub>2v</sub> ) |                |                | 5-trans-T(C <sub>1</sub> ) |                |                |                            |                |                 |
|                                  | M06L                      | B3LYP          | BP86           | M06L                       | B3LYP          | BP86           |                            |                |                 |
| Fe <sub>1</sub> -Fe <sub>2</sub> | 2.640                     | 2.709          | 2.688          | ---                        | ---            | ---            |                            |                |                 |
| -E                               | 3403.80908                | 3403.97687     | 3404.46019     | 3403.80969                 | 3403.98919     | 3404.45430     |                            |                |                 |
| ZPE                              | 0.17694                   | 0.17710        | 0.17293        | 0.17699                    | 0.17754        | 0.17265        |                            |                |                 |
| ΔE                               | 23.39                     | 18.90          | 26.52          | 23.00                      | 11.17          | 30.22          |                            |                |                 |
| ΔE(ZPE)                          | 20.88                     | 9.08           | 28.09          | 20.88                      | 9.08           | 28.09          |                            |                |                 |
| ⟨S <sup>2</sup> ⟩                | 2.1                       | 2.1            | 2.0            | 2.1                        | 2.1            | 2.0            |                            |                |                 |

|                                  | 4-cis-S(C <sub>2</sub> ) |            |             | 4-trans-S(C <sub>2</sub> ) |            |            |
|----------------------------------|--------------------------|------------|-------------|----------------------------|------------|------------|
|                                  | M06L                     | B3LYP      | BP86        | M06L                       | B3LYP      | BP86       |
| Fe <sub>1</sub> -Fe <sub>2</sub> | 2.635                    | 2.632      | 2.635       | ---                        | ---        | ---        |
| -E                               | 3290.44796               | 3290.59680 | 3291.084264 | 3290.42728                 | 3290.57912 | 3291.06999 |
| ZPE                              | 0.17056                  | 0.17040    | 0.16582     | 0.16975                    | 0.16982    | 0.16531    |
| ΔE                               | 11.03                    | 20.91      | 4.44        | 24.01                      | 32.01      | 13.40      |
| ΔE(ZPE)                          | 11.73                    | 21.40      | 4.80        | 24.20                      | 32.13      | 13.43      |
|                                  | 4-cis-T(C <sub>2</sub> ) |            |             | 4-trans-T(C <sub>2</sub> ) |            |            |
|                                  | M06L                     | B3LYP      | BP86        | M06L                       | B3LYP      | BP86       |
| Fe <sub>1</sub> -Fe <sub>2</sub> | 2.497                    | 2.594      | 2.514       | ---                        | ---        | ---        |
| -E                               | 3290.46554               | 3290.63013 | 3291.09134  | 3290.44561                 | 3290.62633 | 3291.06672 |
| ZPE                              | 0.16944                  | 0.16962    | 0.16525     | 0.16930                    | 0.16995    | 0.16513    |
| ΔE                               | 0.00                     | 0.00       | 0.00        | 12.51                      | 2.38       | 15.45      |
| ΔE(ZPE)                          | 0.00                     | 0.00       | 0.00        | 12.42                      | 2.59       | 15.37      |
| ⟨S <sup>2</sup> ⟩                | 2.1                      | 2.1        | 2.0         | 2.1                        | 2.1        | 2.0        |

|                                  | 3-cis-S(C <sub>2v</sub> ) |            |            | 3-trans-S(C <sub>s</sub> ) |            |            |
|----------------------------------|---------------------------|------------|------------|----------------------------|------------|------------|
|                                  | M06L                      | B3LYP      | BP86       | M06L                       | B3LYP      | BP86       |
| Fe <sub>1</sub> -Fe <sub>2</sub> | 2.243                     | 2.231      | 2.249      | ---                        | ---        | ---        |
| -E                               | 3177.07557                | 3177.21545 | 3177.70341 | 3177.01878                 | 3177.17526 | 3177.65092 |
| ZPE                              | 0.16129                   | 0.16132    | 0.15698    | 0.15831                    | 0.15900    | 0.15392    |
| ΔE                               | 7.66                      | 15.14      | 0.63       | 43.30                      | 40.36      | 33.57      |
| ΔE(ZPE)                          | 8.26                      | 16.20      | 1.11       | 42.03                      | 39.96      | 32.13      |
|                                  | 3-cis-T(C <sub>s</sub> )  |            |            | 3-trans-T(C <sub>s</sub> ) |            |            |
|                                  | M06L                      | B3LYP      | BP86       | M06L                       | B3LYP      | BP86       |
| Fe <sub>1</sub> -Fe <sub>2</sub> | 2.446                     | 2.478      | 2.452      | ---                        | ---        | ---        |
| -E                               | 3177.08778                | 3177.23958 | 3177.70442 | 3177.05593                 | 3177.21175 | 3177.67042 |
| ZPE                              | 0.16033                   | 0.159641   | 0.15622    | 0.15774                    | 0.15799    | 0.15375    |
| ΔE                               | 0.00                      | 0.00       | 0.00       | 19.99                      | 17.46      | 21.34      |
| ΔE(ZPE)                          | 0.00                      | 0.00       | 0.00       | 18.36                      | 16.43      | 19.79      |
| ⟨S <sup>2</sup> ⟩                | 2.3                       | 2.5        | 2.1        | 2.3                        | 2.3        | 2.1        |



**Table S2.** Complete tables of metal-carbon, carbon-carbon distances (in Å) for the  $(C_8H_8)Fe_2(CO)_n$  ( $n = 8,7,6,5,4,3$ ) structures by the M06L, B3LYP and BP86 method;

**Table S2-1.** Iron-carbon and Carbon-carbon distances (in Å) for the  $C_8H_8Fe(CO)_3$  structures

|        | $C_8H_8Fe(CO)_3$ -S |       |       | $C_8H_8Fe(CO)_3$ -T |       |       |
|--------|---------------------|-------|-------|---------------------|-------|-------|
|        | M06L                | B3LYP | BP86  | M06L                | B3LYP | BP86  |
| Fe-C1  | 3.822               | 3.848 | 3.885 | 3.679               | 3.756 | 3.806 |
| Fe-C2  | 3.822               | 3.848 | 3.885 | 3.931               | 4.020 | 4.080 |
| Fe-C3  | 3.197               | 3.225 | 3.247 | 3.679               | 3.756 | 3.806 |
| Fe-C4  | 2.202               | 2.218 | 2.249 | 3.021               | 3.071 | 3.093 |
| Fe-C5  | 2.051               | 2.073 | 2.066 | 2.198               | 2.226 | 2.211 |
| Fe-C6  | 2.051               | 2.073 | 2.066 | 2.105               | 2.122 | 2.097 |
| Fe-C7  | 2.202               | 2.218 | 2.249 | 2.198               | 2.226 | 2.211 |
| Fe-C8  | 3.197               | 3.225 | 3.247 | 3.021               | 3.071 | 3.093 |
| C1-C2  | 1.426               | 1.438 | 1.435 | 1.413               | 1.420 | 1.426 |
| C2-C3  | 1.366               | 1.367 | 1.383 | 1.413               | 1.420 | 1.426 |
| C3-C4  | 1.447               | 1.461 | 1.456 | 1.382               | 1.387 | 1.395 |
| C4-C5  | 1.438               | 1.441 | 1.450 | 1.447               | 1.457 | 1.461 |
| C5-C6  | 1.413               | 1.415 | 1.426 | 1.421               | 1.423 | 1.435 |
| C6-C7  | 1.438               | 1.441 | 1.450 | 1.421               | 1.423 | 1.435 |
| C7-C8  | 1.447               | 1.461 | 1.456 | 1.447               | 1.457 | 1.461 |
| C8-C1  | 1.366               | 1.367 | 1.383 | 1.382               | 1.387 | 1.395 |
| Fe-C9  | 1.794               | 1.795 | 1.784 | 1.810               | 1.813 | 1.793 |
| C9-O1  | 1.159               | 1.156 | 1.171 | 1.161               | 1.158 | 1.174 |
| Fe-C10 | 1.792               | 1.798 | 1.781 | 1.810               | 1.813 | 1.793 |
| C10-O2 | 1.161               | 1.158 | 1.175 | 1.161               | 1.158 | 1.174 |
| Fe-C11 | 1.792               | 1.798 | 1.781 | 1.861               | 1.878 | 1.817 |
| C11-O3 | 1.161               | 1.158 | 1.175 | 1.161               | 1.157 | 1.175 |

**Table S2-2.** Iron-carbon and Carbon-carbon distances (in Å) for the  $C_8H_8Fe_2(CO)_8$  structures

|        | 8-cis-S |       |       | 8-trans-S |       |       | 8-cis-T |       |       | 8-trans-T |       |       |
|--------|---------|-------|-------|-----------|-------|-------|---------|-------|-------|-----------|-------|-------|
|        | M06L    | B3LYP | BP86  | M06L      | B3LYP | BP86  | M06L    | B3LYP | BP86  | M06L      | B3LYP | BP86  |
| Fe1-C1 | 2.168   | 2.197 | 2.186 | 4.559     | 4.649 | 4.644 | 2.146   | 2.173 | 2.161 | 4.537     | 4.088 | 4.094 |
| Fe1-C2 | 3.083   | 3.131 | 3.125 | 4.396     | 4.490 | 4.486 | 3.017   | 3.088 | 3.069 | 4.547     | 4.654 | 4.645 |
| Fe1-C3 | 4.263   | 4.310 | 4.312 | 3.821     | 3.912 | 3.895 | 4.097   | 4.251 | 4.217 | 4.004     | 4.641 | 4.624 |
| Fe1-C4 | 5.037   | 5.091 | 5.091 | 3.110     | 3.142 | 3.147 | 4.834   | 5.019 | 4.978 | 3.125     | 4.085 | 4.077 |
| Fe1-C5 | 5.037   | 5.091 | 5.092 | 2.204     | 2.209 | 2.220 | 4.831   | 5.020 | 4.977 | 2.302     | 3.148 | 3.153 |
| Fe1-C6 | 4.263   | 4.310 | 4.312 | 2.189     | 2.198 | 2.207 | 4.091   | 4.252 | 4.217 | 2.262     | 2.272 | 2.268 |
| Fe1-C7 | 3.083   | 3.131 | 3.125 | 3.157     | 3.192 | 3.198 | 3.014   | 3.088 | 3.071 | 3.109     | 2.326 | 2.306 |
| Fe1-C8 | 2.168   | 2.197 | 2.186 | 4.071     | 4.132 | 4.141 | 2.146   | 2.172 | 2.162 | 4.008     | 3.178 | 3.176 |
| Fe2-C1 | 5.037   | 5.091 | 5.091 | 2.336     | 2.376 | 2.409 | 5.911   | 6.250 | 6.526 | 3.109     | 2.326 | 2.306 |
| Fe2-C2 | 4.263   | 4.310 | 4.312 | 2.132     | 2.154 | 2.149 | 4.963   | 5.321 | 5.654 | 2.262     | 2.272 | 2.268 |
| Fe2-C3 | 3.083   | 3.131 | 3.125 | 2.110     | 2.149 | 2.108 | 3.895   | 4.463 | 4.482 | 2.302     | 3.148 | 3.153 |
| Fe2-C4 | 2.168   | 2.197 | 2.186 | 2.411     | 2.530 | 2.431 | 3.380   | 4.270 | 3.658 | 3.125     | 4.085 | 4.077 |
| Fe2-C5 | 2.168   | 2.197 | 2.186 | 3.318     | 3.428 | 3.369 | 3.590   | 4.312 | 3.621 | 4.004     | 4.641 | 4.624 |
| Fe2-C6 | 3.083   | 3.131 | 3.125 | 3.879     | 3.960 | 3.961 | 4.334   | 4.561 | 4.404 | 4.547     | 4.654 | 4.645 |
| Fe2-C7 | 4.263   | 4.310 | 4.312 | 3.827     | 3.888 | 3.929 | 5.323   | 5.403 | 5.593 | 4.537     | 4.088 | 4.094 |
| Fe2-C8 | 5.037   | 5.091 | 5.091 | 3.223     | 3.278 | 3.322 | 6.042   | 6.279 | 6.504 | 4.008     | 3.178 | 3.176 |
| C1-C2  | 1.472   | 1.483 | 1.484 | 1.408     | 1.402 | 1.421 | 1.468   | 1.485 | 1.484 | 1.430     | 1.438 | 1.448 |
| C2-C3  | 1.349   | 1.351 | 1.363 | 1.427     | 1.437 | 1.440 | 1.354   | 1.354 | 1.368 | 1.435     | 1.440 | 1.445 |
| C3-C4  | 1.472   | 1.483 | 1.484 | 1.413     | 1.408 | 1.429 | 1.450   | 1.466 | 1.462 | 1.418     | 1.403 | 1.409 |
| C4-C5  | 1.413   | 1.410 | 1.426 | 1.453     | 1.465 | 1.466 | 1.362   | 1.358 | 1.377 | 1.418     | 1.402 | 1.409 |
| C5-C6  | 1.472   | 1.483 | 1.484 | 1.421     | 1.420 | 1.433 | 1.448   | 1.465 | 1.462 | 1.435     | 1.440 | 1.445 |
| C6-C7  | 1.349   | 1.351 | 1.363 | 1.445     | 1.461 | 1.457 | 1.335   | 1.353 | 1.367 | 1.430     | 1.438 | 1.448 |
| C7-C8  | 1.472   | 1.483 | 1.484 | 1.359     | 1.359 | 1.374 | 1.467   | 1.485 | 1.484 | 1.397     | 1.425 | 1.432 |
| C8-C1  | 1.413   | 1.410 | 1.426 | 1.450     | 1.467 | 1.462 | 1.419   | 1.413 | 1.429 | 1.397     | 1.425 | 1.432 |

**Table S2-3.** Iron-carbon and Carbon-carbon distances (in Å) for the C<sub>8</sub>H<sub>8</sub>Fe<sub>2</sub>(CO)<sub>7</sub> structures

|        | 7-cis-S |       |       | 7-trans-S |       |       | 7-cis-T |       |       | 7-trans-T |       |       |
|--------|---------|-------|-------|-----------|-------|-------|---------|-------|-------|-----------|-------|-------|
|        | M06L    | B3LYP | BP86  | M06L      | B3LYP | BP86  | M06L    | B3LYP | BP86  | M06L      | B3LYP | BP86  |
| Fe1-C1 | 2.071   | 2.093 | 2.085 | 3.813     | 3.831 | 3.859 | 2.212   | 2.248 | 2.160 | 3.078     | 3.120 | 4.165 |
| Fe1-C2 | 2.036   | 2.058 | 2.058 | 3.156     | 3.176 | 3.189 | 2.815   | 2.938 | 2.729 | 3.785     | 3.864 | 3.834 |
| Fe1-C3 | 2.163   | 2.187 | 2.202 | 2.158     | 2.181 | 2.197 | 3.839   | 3.997 | 3.745 | 4.111     | 4.226 | 3.103 |
| Fe1-C4 | 3.404   | 3.432 | 3.444 | 2.063     | 2.085 | 2.082 | 4.628   | 4.795 | 4.532 | 3.878     | 4.010 | 2.217 |
| Fe1-C5 | 4.025   | 4.042 | 4.073 | 2.059     | 2.079 | 2.075 | 4.628   | 4.795 | 4.532 | 3.169     | 3.292 | 2.068 |
| Fe1-C6 | 3.837   | 3.849 | 3.895 | 2.186     | 2.203 | 2.223 | 3.839   | 3.997 | 3.745 | 2.307     | 2.408 | 2.301 |
| Fe1-C7 | 3.093   | 3.118 | 3.151 | 3.233     | 3.263 | 3.278 | 2.815   | 2.938 | 2.729 | 2.070     | 2.088 | 3.198 |
| Fe1-C8 | 2.153   | 2.174 | 2.185 | 3.842     | 3.868 | 3.895 | 2.212   | 2.248 | 2.160 | 2.208     | 2.239 | 3.924 |
| Fe2-C1 | 5.128   | 5.208 | 5.197 | 2.208     | 2.229 | 2.213 | 4.983   | 5.032 | 5.092 | 2.192     | 2.213 | 3.158 |
| Fe2-C2 | 4.530   | 4.592 | 4.586 | 2.225     | 2.259 | 2.240 | 4.210   | 4.260 | 4.307 | 2.225     | 2.231 | 2.246 |
| Fe2-C3 | 3.202   | 3.268 | 3.254 | 3.147     | 3.213 | 3.182 | 3.055   | 3.101 | 3.117 | 3.104     | 3.132 | 2.203 |
| Fe2-C4 | 2.158   | 2.197 | 2.176 | 3.786     | 3.893 | 3.871 | 2.160   | 2.177 | 2.185 | 4.074     | 4.128 | 3.128 |
| Fe2-C5 | 2.193   | 2.225 | 2.212 | 4.451     | 4.575 | 4.558 | 2.160   | 2.177 | 2.185 | 4.665     | 4.744 | 3.982 |
| Fe2-C6 | 3.101   | 3.177 | 3.154 | 4.620     | 4.728 | 4.715 | 3.055   | 3.101 | 3.117 | 4.629     | 4.718 | 4.712 |
| Fe2-C7 | 4.129   | 4.235 | 4.199 | 4.101     | 4.175 | 4.177 | 4.210   | 4.260 | 4.307 | 3.919     | 4.013 | 4.752 |
| Fe2-C8 | 4.860   | 4.968 | 4.929 | 3.168     | 3.208 | 3.204 | 4.983   | 5.032 | 5.092 | 3.095     | 3.142 | 4.154 |
| C1-C2  | 1.412   | 1.415 | 1.425 | 1.414     | 1.411 | 1.428 | 1.457   | 1.470 | 1.467 | 1.423     | 1.421 | 1.450 |
| C2-C3  | 1.448   | 1.449 | 1.456 | 1.467     | 1.480 | 1.478 | 1.357   | 1.357 | 1.378 | 1.439     | 1.453 | 1.436 |
| C3-C4  | 1.494   | 1.508 | 1.506 | 1.438     | 1.440 | 1.448 | 1.466   | 1.480 | 1.477 | 1.389     | 1.388 | 1.479 |
| C4-C5  | 1.409   | 1.404 | 1.421 | 1.408     | 1.411 | 1.421 | 1.416   | 1.415 | 1.427 | 1.405     | 1.418 | 1.424 |
| C5-C6  | 1.453   | 1.466 | 1.465 | 1.439     | 1.441 | 1.450 | 1.466   | 1.480 | 1.477 | 1.419     | 1.417 | 1.438 |
| C6-C7  | 1.354   | 1.355 | 1.368 | 1.459     | 1.473 | 1.470 | 1.357   | 1.357 | 1.378 | 1.426     | 1.433 | 1.438 |
| C7-C8  | 1.463   | 1.477 | 1.474 | 1.356     | 1.357 | 1.371 | 1.457   | 1.470 | 1.467 | 1.410     | 1.409 | 1.414 |
| C8-C1  | 1.439   | 1.441 | 1.452 | 1.444     | 1.458 | 1.457 | 1.389   | 1.388 | 1.411 | 1.467     | 1.480 | 1.404 |

**Table S2-4.** Iron-carbon and Carbon-carbon distances (in Å) for the C<sub>8</sub>H<sub>8</sub>Fe<sub>2</sub>(CO)<sub>6</sub> structures

|        | 6-cis-S |       |       | 6-trans-S |       |       | 6-cis-T |       |       | 6-trans-T |       |       |
|--------|---------|-------|-------|-----------|-------|-------|---------|-------|-------|-----------|-------|-------|
|        | M06L    | B3LYP | BP86  | M06L      | B3LYP | BP86  | M06L    | B3LYP | BP86  | M06L      | B3LYP | BP86  |
| Fe1-C1 | 2.205   | 2.222 | 2.232 | 3.667     | 3.690 | 3.714 | 2.190   | 2.217 | 2.193 | 3.750     | 3.795 | 3.828 |
| Fe1-C2 | 2.062   | 2.074 | 2.066 | 3.667     | 3.690 | 3.714 | 2.077   | 2.094 | 2.071 | 3.965     | 4.025 | 4.086 |
| Fe1-C3 | 2.189   | 2.224 | 2.205 | 3.201     | 3.232 | 3.240 | 2.204   | 2.239 | 2.218 | 3.520     | 3.582 | 3.649 |
| Fe1-C4 | 3.020   | 3.071 | 3.051 | 2.108     | 2.139 | 2.140 | 3.205   | 3.274 | 3.257 | 2.972     | 3.028 | 3.032 |
| Fe1-C5 | 3.775   | 3.830 | 3.820 | 2.056     | 2.077 | 2.075 | 4.066   | 4.136 | 4.140 | 2.183     | 2.217 | 2.199 |
| Fe1-C6 | 3.848   | 3.908 | 3.900 | 2.056     | 2.077 | 2.075 | 4.165   | 4.250 | 4.241 | 2.074     | 2.095 | 2.067 |
| Fe1-C7 | 3.704   | 3.749 | 3.759 | 2.108     | 2.139 | 2.141 | 3.649   | 3.740 | 3.688 | 2.197     | 2.220 | 2.210 |
| Fe1-C8 | 3.108   | 3.142 | 3.156 | 3.201     | 3.233 | 3.241 | 2.875   | 2.954 | 2.877 | 3.073     | 3.110 | 3.098 |
| Fe2-C1 | 3.848   | 3.908 | 3.900 | 2.056     | 2.077 | 2.075 | 4.165   | 4.250 | 4.241 | 3.073     | 3.110 | 3.142 |
| Fe2-C2 | 3.775   | 3.830 | 3.820 | 2.056     | 2.077 | 2.075 | 4.066   | 4.136 | 4.139 | 2.197     | 2.220 | 2.215 |
| Fe2-C3 | 3.020   | 3.071 | 3.051 | 2.108     | 2.139 | 2.141 | 3.205   | 3.274 | 3.257 | 2.074     | 2.095 | 2.066 |
| Fe2-C4 | 2.189   | 2.224 | 2.205 | 3.201     | 3.233 | 3.241 | 2.204   | 2.239 | 2.218 | 2.183     | 2.217 | 2.200 |
| Fe2-C5 | 2.062   | 2.074 | 2.066 | 3.667     | 3.690 | 3.714 | 2.077   | 2.094 | 2.071 | 2.972     | 3.028 | 2.995 |
| Fe2-C6 | 2.205   | 2.222 | 2.232 | 3.667     | 3.690 | 3.714 | 2.190   | 2.217 | 2.193 | 3.520     | 3.582 | 3.580 |
| Fe2-C7 | 3.108   | 3.142 | 3.156 | 3.201     | 3.232 | 3.240 | 2.875   | 2.954 | 2.877 | 3.965     | 4.025 | 4.047 |
| Fe2-C8 | 3.704   | 3.749 | 3.759 | 2.108     | 2.138 | 2.140 | 3.649   | 3.740 | 3.688 | 3.750     | 3.795 | 3.844 |
| C1-C2  | 1.430   | 1.431 | 1.443 | 1.408     | 1.411 | 1.421 | 1.419   | 1.420 | 1.433 | 1.447     | 1.460 | 1.457 |
| C2-C3  | 1.412   | 1.415 | 1.425 | 1.439     | 1.441 | 1.450 | 1.418   | 1.419 | 1.433 | 1.420     | 1.421 | 1.434 |
| C3-C4  | 1.448   | 1.454 | 1.461 | 1.501     | 1.514 | 1.514 | 1.469   | 1.482 | 1.483 | 1.415     | 1.416 | 1.427 |
| C4-C5  | 1.412   | 1.415 | 1.425 | 1.439     | 1.441 | 1.450 | 1.418   | 1.419 | 1.433 | 1.467     | 1.479 | 1.478 |
| C5-C6  | 1.430   | 1.431 | 1.443 | 1.408     | 1.411 | 1.421 | 1.419   | 1.420 | 1.433 | 1.415     | 1.416 | 1.431 |
| C6-C7  | 1.445   | 1.458 | 1.456 | 1.439     | 1.441 | 1.450 | 1.440   | 1.455 | 1.450 | 1.420     | 1.421 | 1.431 |
| C7-C8  | 1.356   | 1.357 | 1.371 | 1.501     | 1.514 | 1.514 | 1.370   | 1.369 | 1.389 | 1.447     | 1.460 | 1.457 |
| C8-C1  | 1.445   | 1.458 | 1.456 | 1.439     | 1.441 | 1.450 | 1.440   | 1.455 | 1.450 | 1.363     | 1.365 | 1.381 |

**Table S2-5.** Iron-carbon and Carbon-carbon distances (in Å) for the C<sub>8</sub>H<sub>8</sub>Fe<sub>2</sub>(CO)<sub>5</sub> structures

|       | 5-cis-S |       |      | 5-cis-S' |       |      | 5-trans-S |       |      | 5-cis-T |       |      | 5-trans-T |       |      |
|-------|---------|-------|------|----------|-------|------|-----------|-------|------|---------|-------|------|-----------|-------|------|
|       | M06     | B3LY  | BP86 | M06      | B3LY  | BP86 | M06       | B3LY  | BP86 | M06     | B3LY  | BP86 | M06       | B3LY  | BP86 |
| Fe1-C | 2.105   | 2.125 | 2.11 | 2.131    | 2.137 | 2.14 | 3.840     | 3.852 | 3.87 | 2.100   | 2.106 | 2.10 | 2.892     | 2.956 | 2.91 |
| Fe1-C | 2.105   | 2.125 | 2.11 | 2.131    | 2.165 | 2.14 | 3.122     | 3.148 | 3.14 | 2.209   | 2.237 | 2.21 | 3.697     | 3.744 | 3.75 |
| Fe1-C | 2.214   | 2.254 | 2.23 | 2.436    | 2.549 | 2.48 | 2.144     | 2.173 | 2.15 | 2.749   | 2.879 | 2.78 | 4.106     | 4.140 | 4.17 |
| Fe1-C | 2.981   | 3.023 | 3.01 | 3.432    | 3.480 | 3.46 | 2.218     | 2.244 | 2.26 | 3.345   | 3.466 | 3.39 | 3.874     | 3.849 | 3.94 |
| Fe1-C | 3.746   | 3.780 | 3.77 | 3.859    | 3.894 | 3.89 | 1.999     | 2.020 | 2.02 | 3.741   | 3.789 | 3.77 | 3.115     | 3.120 | 3.15 |
| Fe1-C | 3.746   | 3.780 | 3.77 | 3.432    | 3.480 | 3.46 | 2.074     | 2.094 | 2.09 | 3.672   | 3.707 | 3.71 | 2.165     | 2.191 | 2.18 |
| Fe1-C | 2.981   | 3.023 | 3.01 | 2.436    | 2.549 | 2.48 | 3.216     | 3.249 | 3.24 | 2.919   | 2.957 | 2.96 | 2.129     | 2.126 | 2.15 |
| Fe1-C | 2.214   | 2.254 | 2.23 | 2.131    | 2.165 | 2.14 | 3.906     | 3.915 | 3.93 | 2.172   | 2.192 | 2.20 | 2.120     | 2.169 | 2.11 |
| Fe2-C | 3.746   | 3.780 | 3.77 | 3.859    | 3.894 | 3.89 | 2.128     | 2.152 | 2.14 | 3.672   | 3.707 | 3.71 | 3.544     | 3.636 | 3.53 |
| Fe2-C | 3.746   | 3.780 | 3.77 | 3.432    | 3.480 | 3.46 | 2.095     | 2.129 | 2.12 | 3.741   | 3.789 | 3.77 | 3.131     | 3.160 | 3.14 |
| Fe2-C | 2.981   | 3.023 | 3.01 | 2.436    | 2.549 | 2.48 | 2.233     | 2.282 | 2.25 | 3.345   | 3.466 | 3.39 | 2.177     | 2.204 | 2.21 |
| Fe2-C | 2.214   | 2.254 | 2.23 | 2.131    | 2.165 | 2.14 | 2.207     | 2.227 | 2.18 | 2.749   | 2.879 | 2.78 | 2.074     | 2.080 | 2.09 |
| Fe2-C | 2.105   | 2.125 | 2.11 | 2.131    | 2.137 | 2.14 | 2.954     | 2.947 | 2.95 | 2.209   | 2.237 | 2.21 | 2.095     | 2.123 | 2.10 |
| Fe2-C | 2.105   | 2.125 | 2.11 | 2.131    | 2.165 | 2.14 | 3.002     | 3.031 | 3.02 | 2.100   | 2.106 | 2.10 | 2.305     | 2.495 | 2.25 |
| Fe2-C | 2.214   | 2.254 | 2.23 | 2.436    | 2.549 | 2.48 | 2.218     | 2.288 | 2.25 | 2.172   | 2.192 | 2.20 | 2.448     | 2.763 | 2.33 |
| Fe2-C | 2.981   | 3.023 | 3.01 | 3.432    | 3.480 | 3.46 | 2.113     | 2.147 | 2.12 | 2.919   | 2.957 | 2.96 | 3.281     | 3.480 | 3.22 |
| C1-C2 | 1.408   | 1.413 | 1.42 | 1.411    | 1.416 | 1.42 | 1.408     | 1.409 | 1.42 | 1.409   | 1.413 | 1.42 | 1.356     | 1.361 | 1.37 |
| C2-C3 | 1.423   | 1.424 | 1.43 | 1.433    | 1.431 | 1.44 | 1.448     | 1.455 | 1.46 | 1.438   | 1.452 | 1.44 | 1.457     | 1.464 | 1.46 |
| C3-C4 | 1.435   | 1.443 | 1.44 | 1.433    | 1.431 | 1.44 | 1.507     | 1.500 | 1.52 | 1.377   | 1.374 | 1.39 | 1.429     | 1.430 | 1.43 |
| C4-C5 | 1.423   | 1.424 | 1.43 | 1.411    | 1.416 | 1.42 | 1.432     | 1.434 | 1.44 | 1.438   | 1.452 | 1.44 | 1.405     | 1.408 | 1.42 |
| C5-C6 | 1.408   | 1.413 | 1.42 | 1.411    | 1.416 | 1.42 | 1.442     | 1.444 | 1.45 | 1.409   | 1.413 | 1.42 | 1.457     | 1.471 | 1.46 |
| C6-C7 | 1.423   | 1.424 | 1.43 | 1.433    | 1.431 | 1.44 | 1.489     | 1.500 | 1.50 | 1.420   | 1.422 | 1.43 | 1.455     | 1.442 | 1.47 |
| C7-C8 | 1.435   | 1.443 | 1.44 | 1.433    | 1.431 | 1.44 | 1.406     | 1.401 | 1.41 | 1.441   | 1.453 | 1.44 | 1.429     | 1.422 | 1.44 |
| C8-C1 | 1.423   | 1.424 | 1.43 | 1.411    | 1.416 | 1.42 | 1.414     | 1.422 | 1.42 | 1.420   | 1.422 | 1.43 | 1.446     | 1.457 | 1.45 |

**Table S2-6.** Iron-carbon and Carbon-carbon distances (in Å) for the C<sub>8</sub>H<sub>8</sub>Fe<sub>2</sub>(CO)<sub>4</sub> structures

|        | 4-cis-S |       |       | 4-trans-S |       |       | 4-cis-T |       |       | 4-trans-T |       |       |
|--------|---------|-------|-------|-----------|-------|-------|---------|-------|-------|-----------|-------|-------|
|        | M06L    | B3LYP | BP86  | M06L      | B3LYP | BP86  | M06L    | B3LYP | BP86  | M06L      | B3LYP | BP86  |
| Fe1-C1 | 2.139   | 2.149 | 2.139 | 3.106     | 3.126 | 3.133 | 2.167   | 2.190 | 2.172 | 2.779     | 2.894 | 2.831 |
| Fe1-C2 | 2.037   | 2.036 | 2.037 | 3.504     | 3.482 | 3.515 | 2.133   | 2.178 | 2.131 | 3.319     | 3.436 | 3.406 |
| Fe1-C3 | 2.303   | 2.265 | 2.303 | 2.985     | 2.958 | 2.985 | 2.402   | 2.547 | 2.414 | 3.783     | 3.869 | 3.875 |
| Fe1-C4 | 3.334   | 3.304 | 3.334 | 2.177     | 2.246 | 2.178 | 3.383   | 3.470 | 3.399 | 3.613     | 3.661 | 3.691 |
| Fe1-C5 | 3.779   | 3.769 | 3.779 | 2.127     | 2.152 | 2.153 | 3.758   | 3.813 | 3.778 | 2.990     | 3.023 | 3.039 |
| Fe1-C6 | 3.386   | 3.406 | 3.386 | 2.102     | 2.158 | 2.129 | 3.289   | 3.328 | 3.310 | 2.152     | 2.180 | 2.169 |
| Fe1-C7 | 2.329   | 2.348 | 2.329 | 2.044     | 2.068 | 2.062 | 2.271   | 2.368 | 2.295 | 2.049     | 2.062 | 2.050 |
| Fe1-C8 | 2.126   | 2.133 | 2.126 | 2.100     | 2.125 | 2.134 | 2.106   | 2.142 | 2.119 | 2.124     | 2.165 | 2.141 |
| Fe2-C1 | 3.779   | 3.769 | 3.779 | 2.100     | 2.125 | 2.134 | 3.758   | 3.813 | 3.778 | 2.124     | 2.165 | 2.141 |
| Fe2-C2 | 3.386   | 3.406 | 3.386 | 2.044     | 2.068 | 2.062 | 3.289   | 3.328 | 3.310 | 2.049     | 2.062 | 2.050 |
| Fe2-C3 | 2.329   | 2.348 | 2.329 | 2.102     | 2.158 | 2.129 | 2.271   | 2.368 | 2.295 | 2.152     | 2.180 | 2.169 |
| Fe2-C4 | 2.126   | 2.133 | 2.126 | 2.127     | 2.152 | 2.153 | 2.106   | 2.142 | 2.119 | 2.990     | 3.023 | 3.039 |
| Fe2-C5 | 2.139   | 2.149 | 2.139 | 2.177     | 2.246 | 2.178 | 2.167   | 2.190 | 2.172 | 3.613     | 3.661 | 3.691 |
| Fe2-C6 | 2.037   | 2.036 | 2.037 | 2.985     | 2.958 | 2.985 | 2.133   | 2.178 | 2.131 | 3.783     | 3.869 | 3.875 |
| Fe2-C7 | 2.303   | 2.265 | 2.303 | 3.504     | 3.483 | 3.515 | 2.402   | 2.547 | 2.414 | 3.319     | 3.436 | 3.406 |
| Fe2-C8 | 3.779   | 3.304 | 3.334 | 3.106     | 3.126 | 3.133 | 3.383   | 3.470 | 3.399 | 2.779     | 2.894 | 2.831 |
| C1-C2  | 1.428   | 1.418 | 1.428 | 1.422     | 1.421 | 1.431 | 1.399   | 1.403 | 1.414 | 1.418     | 1.419 | 1.430 |
| C2-C3  | 1.460   | 1.456 | 1.460 | 1.410     | 1.417 | 1.425 | 1.460   | 1.459 | 1.471 | 1.423     | 1.423 | 1.434 |
| C3-C4  | 1.463   | 1.461 | 1.463 | 1.442     | 1.435 | 1.454 | 1.433   | 1.426 | 1.446 | 1.447     | 1.458 | 1.462 |
| C4-C5  | 1.423   | 1.411 | 1.423 | 1.485     | 1.475 | 1.496 | 1.422   | 1.428 | 1.434 | 1.363     | 1.368 | 1.377 |
| C5-C6  | 1.428   | 1.418 | 1.428 | 1.442     | 1.435 | 1.454 | 1.399   | 1.403 | 1.414 | 1.447     | 1.458 | 1.462 |
| C6-C7  | 1.460   | 1.456 | 1.460 | 1.410     | 1.417 | 1.425 | 1.460   | 1.459 | 1.471 | 1.423     | 1.423 | 1.434 |
| C7-C8  | 1.463   | 1.461 | 1.463 | 1.422     | 1.421 | 1.431 | 1.433   | 1.426 | 1.446 | 1.418     | 1.419 | 1.430 |
| C8-C1  | 1.423   | 1.411 | 1.423 | 1.499     | 1.511 | 1.510 | 1.422   | 1.428 | 1.434 | 1.464     | 1.476 | 1.479 |

**Table S2-7.** Iron-carbon and Carbon-carbon distances (in Å) for the C<sub>8</sub>H<sub>8</sub>Fe<sub>2</sub>(CO)<sub>3</sub> structures

|        | 3-cis-S |       |       | 3-trans-S |       |       | 3-cis-T |       |       | 3-trans-T |       |       |
|--------|---------|-------|-------|-----------|-------|-------|---------|-------|-------|-----------|-------|-------|
|        | M06L    | B3LYP | BP86  | M06L      | B3LYP | BP86  | M06L    | B3LYP | BP86  | M06L      | B3LYP | BP86  |
| Fe1-C1 | 2.038   | 2.063 | 2.055 | 1.931     | 1.953 | 1.939 | 2.117   | 2.140 | 2.123 | 2.076     | 2.101 | 2.065 |
| Fe1-C2 | 2.046   | 2.077 | 2.068 | 2.870     | 2.868 | 2.868 | 2.097   | 2.148 | 2.079 | 2.872     | 2.890 | 2.876 |
| Fe1-C3 | 2.314   | 2.373 | 2.371 | 2.962     | 2.981 | 2.957 | 2.430   | 2.542 | 2.426 | 2.966     | 3.009 | 2.971 |
| Fe1-C4 | 3.192   | 3.211 | 3.214 | 2.215     | 2.258 | 2.201 | 3.297   | 3.345 | 3.299 | 2.251     | 2.328 | 2.244 |
| Fe1-C5 | 3.562   | 3.575 | 3.581 | 2.215     | 2.258 | 2.201 | 3.701   | 3.735 | 3.714 | 2.251     | 2.328 | 2.244 |
| Fe1-C6 | 3.192   | 3.211 | 3.214 | 2.962     | 2.981 | 2.957 | 3.294   | 3.337 | 3.315 | 2.966     | 3.009 | 2.971 |
| Fe1-C7 | 2.314   | 2.373 | 2.371 | 2.870     | 2.868 | 2.868 | 2.273   | 2.358 | 2.338 | 2.872     | 2.890 | 2.876 |
| Fe1-C8 | 2.046   | 2.077 | 2.068 | 1.931     | 1.953 | 1.939 | 2.087   | 2.128 | 2.104 | 2.076     | 2.101 | 2.065 |
| Fe2-C1 | 3.562   | 3.575 | 3.581 | 2.228     | 2.301 | 2.271 | 3.701   | 3.735 | 3.714 | 2.216     | 2.274 | 2.269 |
| Fe2-C2 | 3.192   | 3.211 | 3.214 | 1.984     | 2.005 | 2.005 | 3.297   | 3.345 | 3.299 | 1.996     | 2.274 | 2.269 |
| Fe2-C3 | 2.314   | 2.373 | 2.371 | 2.089     | 2.120 | 2.112 | 2.430   | 2.542 | 2.426 | 2.101     | 2.020 | 2.013 |
| Fe2-C4 | 2.046   | 2.077 | 2.068 | 2.886     | 2.936 | 2.920 | 2.097   | 2.148 | 2.079 | 2.945     | 2.133 | 2.117 |
| Fe2-C5 | 2.038   | 2.063 | 2.055 | 2.886     | 2.936 | 2.920 | 2.117   | 2.140 | 2.123 | 2.945     | 2.982 | 2.972 |
| Fe2-C6 | 2.046   | 2.077 | 2.068 | 2.087     | 2.120 | 2.112 | 2.087   | 2.128 | 2.104 | 2.101     | 2.982 | 2.972 |
| Fe2-C7 | 2.314   | 2.373 | 2.371 | 1.984     | 2.005 | 2.005 | 2.273   | 2.358 | 2.338 | 1.996     | 2.133 | 2.117 |
| Fe2-C8 | 3.192   | 3.211 | 3.214 | 2.228     | 2.301 | 2.272 | 3.294   | 3.337 | 3.315 | 2.216     | 2.020 | 2.013 |
| C1-C2  | 1.422   | 1.424 | 1.437 | 1.462     | 1.474 | 1.472 | 1.426   | 1.433 | 1.440 | 1.457     | 1.464 | 1.470 |
| C2-C3  | 1.435   | 1.437 | 1.444 | 1.421     | 1.418 | 1.434 | 1.426   | 1.427 | 1.442 | 1.422     | 1.420 | 1.436 |
| C3-C4  | 1.435   | 1.437 | 1.444 | 1.490     | 1.499 | 1.504 | 1.426   | 1.427 | 1.442 | 1.489     | 1.499 | 1.504 |
| C4-C5  | 1.422   | 1.424 | 1.437 | 1.371     | 1.368 | 1.388 | 1.426   | 1.433 | 1.440 | 1.368     | 1.363 | 1.382 |
| C5-C6  | 1.422   | 1.424 | 1.437 | 1.490     | 1.499 | 1.504 | 1.402   | 1.403 | 1.418 | 1.489     | 1.499 | 1.504 |
| C6-C7  | 1.435   | 1.437 | 1.444 | 1.421     | 1.418 | 1.434 | 1.451   | 1.451 | 1.456 | 1.422     | 1.420 | 1.436 |
| C7-C8  | 1.435   | 1.437 | 1.444 | 1.462     | 1.474 | 1.472 | 1.451   | 1.451 | 1.456 | 1.457     | 1.464 | 1.470 |
| C8-C1  | 1.422   | 1.424 | 1.437 | 1.646     | 1.596 | 1.656 | 1.402   | 1.403 | 1.418 | 1.514     | 1.506 | 1.524 |

Table S3. Coordinates of the optimized  $(C_8H_8)Fe_2(CO)_n$  ( $n = 8, 7, 6, 5, 4, 3$ ) structures (Table S3) by the M06L method

| $C_8H_8Fe(CO)_3-S(C_{2v})$ |           |           |           | $C_8H_8Fe(CO)_3-T(C_s)$ |           |           |           |
|----------------------------|-----------|-----------|-----------|-------------------------|-----------|-----------|-----------|
|                            | x         | y         | z         |                         | x         | y         | z         |
| 6                          | -0.348606 | -2.030537 | 1.611785  | 6                       | 2.695361  | 0.265932  | 1.307882  |
| 6                          | -0.839565 | -2.934035 | 0.712823  | 6                       | 3.204276  | 0.100921  | 0.000000  |
| 6                          | -0.839565 | -2.934035 | -0.712823 | 6                       | 2.695361  | 0.265932  | -1.307882 |
| 6                          | 0.519884  | -0.876111 | 1.522617  | 6                       | 1.509925  | 0.733649  | 1.843398  |
| 6                          | 1.659384  | -0.555496 | 0.706314  | 6                       | 0.311490  | 1.319580  | 1.284106  |
| 1                          | -0.687390 | -2.194967 | 2.635094  | 1                       | 3.394466  | -0.074275 | 2.071151  |
| 1                          | -1.424212 | -3.737327 | 1.158880  | 1                       | 4.216863  | -0.302977 | 0.000000  |
| 1                          | -1.424212 | -3.737327 | -1.158880 | 1                       | 3.394466  | -0.074275 | -2.071151 |
| 1                          | 0.636281  | -0.427421 | 2.510067  | 1                       | 1.449126  | 0.642158  | 2.927656  |
| 1                          | 2.524165  | -0.115519 | 1.199752  | 1                       | -0.334572 | 1.728618  | 2.060351  |
| 6                          | -0.348606 | -2.030537 | -1.611785 | 6                       | 1.509925  | 0.733649  | -1.843398 |
| 1                          | -0.687390 | -2.194967 | -2.635094 | 1                       | 1.449126  | 0.642158  | -2.927656 |
| 6                          | 0.519884  | -0.876111 | -1.522617 | 6                       | 0.311490  | 1.319580  | -1.284106 |
| 1                          | 0.636281  | -0.427421 | -2.510067 | 1                       | -0.334572 | 1.728618  | -2.060351 |
| 6                          | 1.659384  | -0.555496 | -0.706314 | 6                       | 0.000000  | 1.842386  | 0.000000  |
| 1                          | 2.524165  | -0.115519 | -1.199752 | 1                       | -0.835798 | 2.539418  | 0.000000  |
| 6                          | 0.386814  | 1.891988  | 1.303421  | 6                       | -0.791722 | -1.335934 | 1.353623  |
| 6                          | 0.386814  | 1.891988  | -1.303421 | 6                       | -2.520712 | 0.331911  | 0.000000  |
| 8                          | 0.519884  | 2.696487  | 2.130547  | 8                       | -0.834158 | -2.111974 | 2.216190  |
| 8                          | 0.519884  | 2.696487  | -2.130547 | 8                       | -3.642617 | 0.630674  | 0.000000  |
| 26                         | 0.181737  | 0.678816  | 0.000000  | 26                      | -0.719783 | -0.135889 | 0.000000  |
| 6                          | -1.607143 | 0.537192  | 0.000000  | 6                       | -0.791722 | -1.335934 | -1.353623 |
| 8                          | -2.754197 | 0.373074  | 0.000000  | 8                       | -0.834158 | -2.111974 | -2.216190 |



| 8-cis-S(C <sub>2v</sub> ) |           |           |           | 8-trans-S(C <sub>1</sub> ) |           |           |           |
|---------------------------|-----------|-----------|-----------|----------------------------|-----------|-----------|-----------|
|                           | x         | y         | z         |                            | x         | y         | z         |
| 6                         | 0.706600  | 1.607769  | 1.240678  | 6                          | 0.692106  | -0.768437 | -0.561022 |
| 6                         | -0.706600 | 1.607769  | 1.240678  | 6                          | 1.104363  | 0.352734  | -1.331267 |
| 6                         | -1.636372 | 0.674291  | 0.584785  | 6                          | 0.596170  | 1.704210  | -1.385302 |
| 6                         | 1.636372  | 0.674291  | 0.584785  | 6                          | -0.265058 | -0.967532 | 0.513771  |
| 6                         | 1.636372  | -0.674291 | 0.584785  | 6                          | -0.835044 | -0.174992 | 1.535588  |
| 1                         | 1.182754  | 2.153054  | 2.057598  | 1                          | 0.859976  | -1.711749 | -1.079102 |
| 1                         | -1.182754 | 2.153054  | 2.057598  | 1                          | 1.566469  | 0.073089  | -2.275892 |
| 1                         | -2.517887 | 1.147105  | 0.148949  | 1                          | 1.077394  | 2.301088  | -2.158497 |
| 1                         | 2.517887  | 1.147105  | 0.148949  | 1                          | -0.340622 | -2.027642 | 0.758803  |
| 1                         | 2.517887  | -1.147105 | 0.148949  | 1                          | -1.062985 | -0.699623 | 2.460515  |
| 6                         | -1.636372 | -0.674291 | 0.584785  | 6                          | -0.427800 | 2.334895  | -0.752793 |
| 1                         | -2.517887 | -1.147105 | 0.148949  | 1                          | -0.643219 | 3.322704  | -1.156959 |
| 6                         | -0.706600 | -1.607769 | 1.240678  | 6                          | -1.304607 | 2.029758  | 0.361297  |
| 1                         | -1.182754 | -2.153054 | 2.057598  | 1                          | -1.981559 | 2.865110  | 0.543372  |
| 6                         | 0.706600  | -1.607769 | 1.240678  | 6                          | -1.251031 | 1.189655  | 1.489665  |
| 1                         | 1.182754  | -2.153054 | 2.057598  | 1                          | -1.770980 | 1.543142  | 2.375948  |
| 26                        | 0.000000  | 3.213680  | -0.032844 | 26                         | 2.700081  | -0.131926 | 0.086333  |
| 6                         | 1.519097  | 3.972102  | -0.630829 | 6                          | 3.067403  | -1.229353 | 1.469206  |
| 6                         | 0.000000  | 2.100905  | -1.480609 | 6                          | 3.352710  | -1.351746 | -1.095311 |
| 8                         | 2.491513  | 4.471225  | -1.023736 | 8                          | 3.322496  | -1.917185 | 2.367979  |
| 8                         | 0.000000  | 1.458207  | -2.439506 | 8                          | 3.771388  | -2.124846 | -1.845648 |
| 6                         | 1.519097  | -3.972102 | -0.630829 | 6                          | -3.600985 | -0.615070 | 1.435446  |
| 6                         | -1.519097 | 3.972102  | -0.630829 | 6                          | 4.069751  | 0.970990  | -0.308901 |
| 6                         | -1.519097 | -3.972102 | -0.630829 | 6                          | -3.661198 | 1.048969  | -0.614634 |
| 8                         | -2.491513 | 4.471225  | -1.023736 | 8                          | 4.974692  | 1.658346  | -0.542279 |
| 8                         | 2.491513  | -4.471225 | -1.023736 | 8                          | -4.394497 | -1.119947 | 2.112761  |
| 8                         | -2.491513 | -4.471225 | -1.023736 | 8                          | -4.434391 | 1.777978  | -1.081677 |
| 26                        | 0.000000  | -3.213680 | -0.032844 | 26                         | -2.448268 | 0.000572  | 0.186694  |
| 6                         | 0.000000  | -2.100905 | -1.480609 | 6                          | -1.995203 | -0.634819 | -1.596062 |
| 8                         | 0.000000  | -1.458207 | -2.439506 | 8                          | -1.479930 | -0.404809 | -2.660730 |
| 6                         | 0.000000  | -4.327013 | 1.398298  | 6                          | 2.064486  | 1.142782  | 1.226033  |
| 6                         | 0.000000  | 4.327013  | 1.398298  | 8                          | 1.739498  | 1.974413  | 1.959154  |
| 8                         | 0.000000  | 5.037437  | 2.311864  | 6                          | -2.734467 | -1.587535 | -0.813866 |
| 8                         | 0.000000  | -5.037437 | 2.311864  | 8                          | -3.184407 | -2.708699 | -0.809307 |

| 8-cis-T(C <sub>1</sub> ) |           |           |           | 8-trans-T(C <sub>2</sub> ) |           |           |           |
|--------------------------|-----------|-----------|-----------|----------------------------|-----------|-----------|-----------|
|                          | x         | y         | z         |                            | x         | y         | z         |
| 6                        | 2.235591  | 1.730615  | -0.068606 | 6                          | -0.927203 | -0.656830 | 0.922827  |
| 6                        | 2.172870  | 1.072065  | -1.323903 | 6                          | -1.341940 | 0.671297  | 1.274374  |
| 6                        | 1.063863  | 0.448582  | -2.055643 | 6                          | -0.941858 | 1.987514  | 0.882742  |
| 6                        | 1.213353  | 2.014656  | 0.944952  | 6                          | 0.000000  | -1.202901 | 0.000000  |
| 6                        | -0.113574 | 2.272889  | 0.857075  | 6                          | 0.927207  | -0.656864 | -0.922810 |
| 1                        | 3.102536  | 2.383750  | 0.051232  | 1                          | -1.262707 | -1.402214 | 1.642737  |
| 1                        | 2.999883  | 1.311674  | -1.995708 | 1                          | -1.878146 | 0.692399  | 2.222421  |
| 1                        | 1.404921  | -0.328469 | -2.741556 | 1                          | -1.506347 | 2.750889  | 1.418392  |
| 1                        | 1.638513  | 2.116932  | 1.944568  | 1                          | 0.000000  | -2.292813 | 0.000000  |
| 1                        | -0.576641 | 2.551312  | 1.804491  | 1                          | 1.262712  | -1.402273 | -1.642694 |
| 6                        | -0.259306 | 0.729806  | -2.120431 | 6                          | 0.000000  | 2.520920  | 0.000000  |
| 1                        | -0.802869 | 0.141067  | -2.861465 | 1                          | 0.000000  | 3.610080  | 0.000000  |
| 6                        | -1.091434 | 1.722587  | -1.469478 | 6                          | 0.941853  | 1.987483  | -0.882830 |
| 1                        | -1.978009 | 1.971803  | -2.057161 | 1                          | 1.506335  | 2.750840  | -1.418512 |
| 6                        | -1.031635 | 2.347560  | -0.260674 | 6                          | 1.341945  | 0.671252  | -1.274405 |
| 1                        | -1.882796 | 2.999364  | -0.055732 | 1                          | 1.878150  | 0.692319  | -2.222453 |
| 26                       | 3.017381  | -0.258398 | 0.132224  | 26                         | -2.954795 | -0.186016 | -0.060070 |
| 6                        | 3.502816  | -0.417366 | 1.864127  | 6                          | -3.462399 | -1.655165 | -0.989631 |
| 6                        | 1.325441  | -0.847026 | 0.542237  | 6                          | -3.726044 | -0.840287 | 1.450799  |
| 8                        | 3.815692  | -0.513835 | 2.976314  | 8                          | -3.820734 | -2.579087 | -1.593371 |
| 8                        | 0.282954  | -1.251466 | 0.822936  | 8                          | -4.223000 | -1.253363 | 2.410921  |
| 6                        | -2.353295 | -1.592663 | -0.929629 | 6                          | 3.726049  | -0.840344 | -1.450778 |
| 6                        | 3.352875  | -1.788267 | -0.766427 | 6                          | -4.222325 | 1.105452  | -0.188011 |
| 6                        | -4.317435 | 1.351985  | -0.288756 | 6                          | 4.222341  | 1.105442  | 0.187981  |
| 8                        | 3.568224  | -2.767097 | -1.349144 | 8                          | -5.051691 | 1.910044  | -0.289366 |
| 8                        | -1.700831 | -2.432019 | -1.388045 | 8                          | 4.223012  | -1.253447 | -2.410885 |
| 8                        | -4.853721 | 2.377616  | -0.345059 | 8                          | 5.051678  | 1.910059  | 0.289375  |
| 26                       | -3.455004 | -0.298524 | -0.144827 | 26                         | 2.954797  | -0.186017 | 0.060068  |
| 6                        | -4.873209 | -1.366774 | 0.360087  | 6                          | 2.103022  | 0.476155  | 1.546674  |
| 8                        | -5.759032 | -2.036287 | 0.696428  | 8                          | 1.628264  | 0.879287  | 2.518006  |
| 6                        | -2.680307 | -0.123601 | 1.517368  | 6                          | -2.103025 | 0.476085  | -1.546710 |
| 6                        | 4.651858  | 0.397665  | -0.298555 | 8                          | -1.628270 | 0.879173  | -2.518061 |
| 8                        | 5.686073  | 0.831129  | -0.579858 | 6                          | 3.462393  | -1.655129 | 0.989703  |
| 8                        | -2.204130 | -0.006007 | 2.568497  | 8                          | 3.820723  | -2.579021 | 1.593490  |

| 7-cis-S(C <sub>1</sub> ) |           |           |           | 7-trans-S(C <sub>1</sub> ) |           |           |           |
|--------------------------|-----------|-----------|-----------|----------------------------|-----------|-----------|-----------|
|                          | x         | y         | z         |                            | x         | y         | z         |
| 6                        | 0.798725  | 0.124474  | -1.370988 | 6                          | 0.496629  | 0.604964  | 0.771816  |
| 6                        | 1.252660  | -1.202454 | -1.238342 | 6                          | 0.950540  | -0.613809 | 1.327864  |
| 6                        | 0.560546  | -2.285733 | -0.560982 | 6                          | 0.450406  | -1.957029 | 1.150463  |
| 6                        | -0.521177 | 0.757559  | -1.071210 | 6                          | -0.520936 | 0.958627  | -0.224089 |
| 6                        | -1.631590 | 0.481422  | -1.957806 | 6                          | -1.006008 | 0.351400  | -1.433501 |
| 1                        | 1.261690  | 0.676792  | -2.194005 | 1                          | 0.682695  | 1.460980  | 1.420073  |
| 1                        | 2.042261  | -1.523444 | -1.917377 | 1                          | 1.474629  | -0.498377 | 2.275363  |
| 1                        | 1.201682  | -3.064592 | -0.148475 | 1                          | 1.005891  | -2.707588 | 1.710971  |
| 1                        | -0.363627 | 1.833417  | -0.951639 | 1                          | -0.524348 | 2.045024  | -0.332038 |
| 1                        | -2.086152 | 1.246132  | -2.586106 | 1                          | -1.145364 | 0.990077  | -2.304017 |
| 6                        | -0.770769 | -2.471668 | -0.401372 | 6                          | -0.655385 | -2.415551 | 0.512613  |
| 1                        | -1.040787 | -3.349237 | 0.186766  | 1                          | -0.865239 | -3.468818 | 0.699807  |
| 6                        | -1.960408 | -1.782691 | -0.900694 | 6                          | -1.664781 | -1.821679 | -0.357867 |
| 1                        | -2.823164 | -2.442648 | -0.791147 | 1                          | -2.454261 | -2.553660 | -0.534907 |
| 6                        | -2.236226 | -0.793711 | -1.908608 | 6                          | -1.560930 | -0.941787 | -1.491426 |
| 1                        | -3.149233 | -0.930800 | -2.487092 | 1                          | -2.096044 | -1.210328 | -2.400250 |
| 26                       | 2.402644  | 0.126864  | 0.072957  | 26                         | 2.510231  | 0.131038  | -0.047066 |
| 6                        | 2.374224  | 1.867042  | 0.523208  | 6                          | 2.700773  | 1.459884  | -1.241585 |
| 6                        | 1.344929  | -0.260684 | 1.504799  | 6                          | 3.187215  | 1.172073  | 1.276474  |
| 8                        | 2.356196  | 2.988796  | 0.824396  | 8                          | 2.837642  | 2.301783  | -2.030852 |
| 8                        | 0.803679  | -0.502825 | 2.496287  | 8                          | 3.618768  | 1.835375  | 2.121438  |
| 6                        | -4.126695 | -0.085036 | -0.003312 | 6                          | -3.143107 | 1.836628  | -0.232876 |
| 6                        | 3.667613  | -0.893916 | 0.849618  | 6                          | 3.923123  | -0.969709 | 0.112820  |
| 6                        | -2.032746 | -0.485932 | 1.572910  | 6                          | -4.139975 | -0.535046 | -0.383194 |
| 8                        | 4.495956  | -1.526322 | 1.363665  | 8                          | 4.864438  | -1.646690 | 0.189617  |
| 8                        | -5.274930 | -0.249941 | 0.035913  | 8                          | -3.545666 | 2.919657  | -0.345566 |
| 8                        | -1.954437 | -0.962960 | 2.625615  | 8                          | -5.190505 | -0.982409 | -0.592131 |
| 26                       | -2.349703 | 0.168343  | -0.078198 | 26                         | -2.520238 | 0.165935  | -0.045094 |
| 6                        | -2.521598 | 1.907488  | 0.327843  | 6                          | -2.462496 | 0.032959  | 1.743216  |
| 8                        | -2.616228 | 3.032435  | 0.593675  | 8                          | -2.361903 | -0.077070 | 2.893009  |
| 6                        | 3.564230  | 0.471672  | -1.276340 | 6                          | 1.851991  | -0.980619 | -1.329522 |
| 8                        | 4.316084  | 0.694818  | -2.127926 | 8                          | 1.494708  | -1.708949 | -2.153775 |

| 7-cis-T(C <sub>s</sub> ) |           |           |           | 7-trans-T(C <sub>1</sub> ) |           |           |           |
|--------------------------|-----------|-----------|-----------|----------------------------|-----------|-----------|-----------|
|                          | x         | y         | z         |                            | x         | y         | z         |
| 6                        | 1.438149  | -1.464150 | 0.707940  | 6                          | -0.530645 | -1.715454 | 1.449262  |
| 6                        | 1.438149  | -1.464150 | -0.707940 | 6                          | 0.346260  | -2.617553 | 0.861658  |
| 6                        | 0.985333  | -0.442489 | -1.657172 | 6                          | 1.311484  | -2.555978 | -0.157345 |
| 6                        | 0.985333  | -0.442489 | 1.657172  | 6                          | -0.784597 | -0.306023 | 1.311196  |
| 6                        | 1.144276  | 0.905489  | 1.651276  | 6                          | -0.380937 | 0.697595  | 0.386129  |
| 1                        | 2.126154  | -2.170946 | 1.176062  | 1                          | -1.121335 | -2.149350 | 2.255974  |
| 1                        | 2.126154  | -2.170946 | -1.176062 | 1                          | 0.299078  | -3.601830 | 1.326099  |
| 1                        | 0.570274  | -0.855935 | -2.577438 | 1                          | 1.897796  | -3.469541 | -0.246404 |
| 1                        | 0.570274  | -0.855935 | 2.577438  | 1                          | -1.168213 | 0.110048  | 2.242345  |
| 1                        | 0.852205  | 1.407993  | 2.574303  | 1                          | -0.444347 | 1.704227  | 0.799635  |
| 6                        | 1.144276  | 0.905489  | -1.651276 | 6                          | 1.683073  | -1.582833 | -1.121095 |
| 1                        | 0.852205  | 1.407993  | -2.574303 | 1                          | 2.375172  | -1.979620 | -1.862763 |
| 6                        | 1.796670  | 1.789768  | -0.694635 | 6                          | 1.137470  | -0.328346 | -1.525201 |
| 1                        | 2.423990  | 2.549125  | -1.160641 | 1                          | 1.484692  | -0.000369 | -2.506149 |
| 6                        | 1.796670  | 1.789768  | 0.694635  | 6                          | 0.503862  | 0.690358  | -0.783414 |
| 1                        | 2.423990  | 2.549125  | 1.160641  | 1                          | 0.395690  | 1.613590  | -1.353431 |
| 26                       | -0.151434 | -2.743851 | 0.000000  | 26                         | -2.463226 | 0.183017  | -0.064884 |
| 6                        | -0.935294 | -3.372882 | 1.498506  | 6                          | -2.955534 | 1.488432  | 1.098227  |
| 6                        | -1.291688 | -1.312423 | 0.000000  | 6                          | -2.851018 | 1.239860  | -1.474778 |
| 8                        | -1.444595 | -3.778992 | 2.458261  | 8                          | -3.261058 | 2.323286  | 1.837968  |
| 8                        | -2.054342 | -0.447499 | 0.000000  | 8                          | -3.109384 | 1.911837  | -2.384630 |
| 6                        | 0.031215  | 4.103366  | 1.357791  | 6                          | 4.314582  | -0.267154 | -0.365604 |
| 6                        | -0.935294 | -3.372882 | -1.498506 | 6                          | -1.906663 | -1.156167 | -1.182824 |
| 6                        | 0.031215  | 4.103366  | -1.357791 | 6                          | 2.394780  | -0.044510 | 1.572484  |
| 8                        | -1.444595 | -3.778992 | -2.458261 | 8                          | -1.599926 | -2.001418 | -1.905919 |
| 8                        | 0.036144  | 4.889400  | 2.216297  | 8                          | 5.406442  | -0.656600 | -0.449184 |
| 8                        | 0.036144  | 4.889400  | -2.216297 | 8                          | 2.316916  | -0.229232 | 2.714606  |
| 26                       | -0.000325 | 2.876777  | 0.000000  | 26                         | 2.612122  | 0.332947  | -0.231757 |
| 6                        | -1.829743 | 2.550208  | 0.000000  | 6                          | 2.946177  | 2.106478  | -0.065521 |
| 8                        | -2.988527 | 2.484339  | 0.000000  | 6                          | -3.896496 | -0.809206 | 0.409456  |
| 6                        | 1.009488  | -4.139382 | 0.000000  | 8                          | -4.834746 | -1.429198 | 0.693546  |
| 8                        | 1.753264  | -5.024681 | 0.000000  | 8                          | 3.134178  | 3.246425  | 0.066308  |

| 6-cis-S(C <sub>s</sub> ) |           |           |           | 6-trans-S(C <sub>i</sub> ) |           |           |           |
|--------------------------|-----------|-----------|-----------|----------------------------|-----------|-----------|-----------|
|                          | x         | y         | z         |                            | x         | y         | z         |
| 6                        | 1.091013  | -1.663723 | 1.671760  | 6                          | 1.005145  | -0.647445 | 1.608058  |
| 6                        | 1.970746  | -0.536603 | 1.662865  | 6                          | 1.005630  | 0.759975  | 1.557674  |
| 6                        | 2.824282  | 0.088023  | 0.678095  | 6                          | 0.650815  | 1.412360  | 0.324717  |
| 6                        | 0.126388  | -2.069936 | 0.724212  | 6                          | 0.649770  | -1.386069 | 0.424805  |
| 6                        | 0.126388  | -2.069936 | -0.724212 | 6                          | -0.650815 | -1.412360 | -0.324717 |
| 1                        | 0.982680  | -2.145496 | 2.641642  | 1                          | 1.451151  | -1.147526 | 2.465682  |
| 1                        | 2.339570  | -0.340375 | 2.670111  | 1                          | 1.452116  | 1.319700  | 2.377355  |
| 1                        | 3.584129  | 0.722578  | 1.131663  | 1                          | 1.024952  | 2.439933  | 0.312629  |
| 1                        | -0.597672 | -2.774221 | 1.131985  | 1                          | 1.023236  | -2.412114 | 0.486119  |
| 1                        | -0.597672 | -2.774221 | -1.131985 | 1                          | -1.024952 | -2.439933 | -0.312629 |
| 6                        | 2.824282  | 0.088023  | -0.678095 | 6                          | -0.649770 | 1.386069  | -0.424805 |
| 1                        | 3.584129  | 0.722578  | -1.131663 | 1                          | -1.023236 | 2.412114  | -0.486119 |
| 6                        | 1.970746  | -0.536603 | -1.662865 | 6                          | -1.005145 | 0.647445  | -1.608058 |
| 1                        | 2.339570  | -0.340375 | -2.670111 | 1                          | -1.451151 | 1.147526  | -2.465682 |
| 6                        | 1.091013  | -1.663723 | -1.671760 | 6                          | -1.005630 | -0.759975 | -1.557674 |
| 1                        | 0.982680  | -2.145496 | -2.641642 | 1                          | -1.452116 | -1.319700 | -2.377355 |
| 26                       | -0.172063 | -0.042860 | -1.495039 | 26                         | -2.194950 | -0.001259 | -0.061347 |
| 6                        | -0.340672 | -0.067844 | -3.256071 | 6                          | -3.433547 | -1.296819 | -0.213513 |
| 6                        | -1.957782 | -0.094908 | -1.401885 | 8                          | -4.218019 | -2.147921 | -0.300221 |
| 8                        | -0.428660 | -0.046951 | -4.415018 | 6                          | 3.432527  | -1.281235 | 0.304992  |
| 8                        | -3.116620 | -0.136161 | -1.463491 | 6                          | -3.432527 | 1.281235  | -0.304992 |
| 6                        | -0.340672 | -0.067844 | 3.256071  | 6                          | 2.046345  | -0.062228 | -1.719652 |
| 6                        | 0.169116  | 1.722981  | -1.367979 | 8                          | -4.216391 | 2.124652  | -0.451576 |
| 8                        | 0.403578  | 2.856106  | -1.462435 | 8                          | 4.216391  | -2.124652 | 0.451576  |
| 8                        | -0.428660 | -0.046951 | 4.415018  | 8                          | 1.937007  | -0.103518 | -2.874656 |
| 26                       | -0.172063 | -0.042860 | 1.495039  | 26                         | 2.194950  | 0.001259  | 0.061347  |
| 6                        | 0.169116  | 1.722981  | 1.367979  | 6                          | 3.433547  | 1.296819  | 0.213513  |
| 8                        | 0.403578  | 2.856106  | 1.462435  | 8                          | 4.218019  | 2.147921  | 0.300221  |
| 6                        | -1.957782 | -0.094908 | 1.401885  | 6                          | -2.046345 | 0.062228  | 1.719652  |
| 8                        | -3.116620 | -0.136161 | 1.463491  | 8                          | -1.937007 | 0.103518  | 2.874656  |

| 6-cis-T(C <sub>s</sub> ) |           |           |           | 6-trans-T(C <sub>2</sub> ) |           |           |           |
|--------------------------|-----------|-----------|-----------|----------------------------|-----------|-----------|-----------|
|                          | x         | y         | z         |                            | x         | y         | z         |
| 6                        | 1.216387  | -1.652328 | 1.656908  | 6                          | 0.861630  | -0.073649 | -1.496458 |
| 6                        | 2.030789  | -0.491341 | 1.702527  | 6                          | 1.166430  | 1.290305  | -1.245655 |
| 6                        | 2.471342  | 0.427799  | 0.684942  | 6                          | 0.494608  | 2.309798  | -0.469149 |
| 6                        | 0.181300  | -1.950080 | 0.734542  | 6                          | 0.434669  | -1.073572 | -0.590628 |
| 6                        | 0.181300  | -1.950080 | -0.734542 | 6                          | -0.434687 | -1.073554 | 0.590782  |
| 1                        | 1.205013  | -2.238192 | 2.573329  | 1                          | 1.241496  | -0.460393 | -2.439064 |
| 1                        | 2.558725  | -0.365133 | 2.646411  | 1                          | 1.772346  | 1.725921  | -2.038715 |
| 1                        | 2.934310  | 1.314681  | 1.117167  | 1                          | 0.836138  | 3.308636  | -0.737326 |
| 1                        | -0.515024 | -2.696525 | 1.114186  | 1                          | 0.507105  | -2.074998 | -1.013179 |
| 1                        | -0.515024 | -2.696525 | -1.114186 | 1                          | -0.507119 | -2.074961 | 1.013376  |
| 6                        | 2.471342  | 0.427799  | -0.684942 | 6                          | -0.494561 | 2.309820  | 0.469194  |
| 1                        | 2.934310  | 1.314681  | -1.117167 | 1                          | -0.836008 | 3.308677  | 0.737405  |
| 6                        | 2.030789  | -0.491341 | -1.702527 | 6                          | -1.166487 | 1.290354  | 1.245647  |
| 1                        | 2.558725  | -0.365133 | -2.646411 | 1                          | -1.772450 | 1.726002  | 2.038653  |
| 6                        | 1.216387  | -1.652328 | -1.656908 | 6                          | -0.861706 | -0.073594 | 1.496534  |
| 1                        | 1.205013  | -2.238192 | -2.573329 | 1                          | -1.241626 | -0.460294 | 2.439137  |
| 26                       | -0.113211 | -0.068157 | -1.843400 | 26                         | 2.315372  | -0.124439 | -0.018790 |
| 6                        | -0.248482 | -0.173568 | -3.665588 | 6                          | 2.555162  | -1.321416 | 1.305455  |
| 6                        | -1.885985 | -0.170977 | -1.599732 | 6                          | 3.655405  | -0.738821 | -1.115605 |
| 8                        | -0.322659 | -0.228947 | -4.823442 | 8                          | 2.705602  | -2.104646 | 2.150475  |
| 8                        | -3.041380 | -0.256836 | -1.517722 | 8                          | 4.512863  | -1.132028 | -1.792363 |
| 6                        | -0.248482 | -0.173568 | 3.665588  | 6                          | -2.555211 | -1.321653 | -1.305234 |
| 6                        | 0.023421  | 1.747275  | -1.716031 | 6                          | 3.241845  | 1.229856  | 0.727867  |
| 8                        | 0.117517  | 2.902853  | -1.672378 | 6                          | -3.655549 | -0.738491 | 1.115621  |
| 8                        | -0.322659 | -0.228947 | 4.823442  | 8                          | 3.832208  | 2.111695  | 1.198662  |
| 26                       | -0.113211 | -0.068157 | 1.843400  | 8                          | -2.705689 | -2.105024 | -2.150118 |
| 6                        | 0.023421  | 1.747275  | 1.716031  | 8                          | -4.513100 | -1.131475 | 1.792390  |
| 8                        | 0.117517  | 2.902853  | 1.672378  | 26                         | -2.315369 | -0.124451 | 0.018792  |
| 6                        | -1.885985 | -0.170977 | 1.599732  | 6                          | -3.241615 | 1.229819  | -0.728203 |
| 8                        | -3.041380 | -0.256836 | 1.517722  | 8                          | -3.831828 | 2.111644  | -1.199212 |

| 5-cis-S(C <sub>2v</sub> ) |           |           |           | 5-cis-S'(C <sub>2v</sub> ) |           |           |           | 5-trans-S(C <sub>1</sub> ) |           |           |           |
|---------------------------|-----------|-----------|-----------|----------------------------|-----------|-----------|-----------|----------------------------|-----------|-----------|-----------|
|                           | x         | y         | z         |                            | x         | y         | z         |                            | x         | y         | z         |
| 6                         | 0.703823  | 1.730064  | -1.950432 | 6                          | -0.501549 | -1.062001 | -1.235675 | 6                          | 1.246530  | 1.321555  | -1.717880 |
| 6                         | -0.703823 | 1.730064  | -1.950432 | 6                          | 0.137575  | 0.219247  | -1.240735 | 6                          | 0.000000  | 1.889615  | -2.056577 |
| 6                         | -1.553494 | 0.717340  | -1.424257 | 6                          | 0.009410  | 1.178248  | -0.085389 | 6                          | -1.246530 | 1.321555  | -1.717880 |
| 6                         | 1.553494  | 0.717340  | -1.424257 | 6                          | -0.576310 | -1.624601 | 0.089849  | 6                          | 1.561657  | 0.000000  | -1.263567 |
| 6                         | 1.553494  | -0.717340 | -1.424257 | 6                          | 0.744802  | -1.693853 | 0.773441  | 6                          | 1.246530  | -1.321555 | -1.717880 |
| 1                         | 1.182736  | 2.679788  | -2.175628 | 6                          | -0.760113 | -1.559793 | -2.166413 | 6                          | -1.561657 | 0.000000  | -1.263567 |
| 1                         | -1.182736 | 2.679788  | -2.175628 | 6                          | 0.152755  | 0.735818  | -2.199979 | 6                          | -1.246530 | -1.321555 | -1.717880 |
| 1                         | -2.539954 | 1.105199  | -1.175233 | 6                          | -0.049020 | 2.177335  | -0.519590 | 6                          | 0.000000  | -1.889615 | -2.056577 |
| 1                         | 2.539954  | 1.105199  | -1.175233 | 26                         | -1.118509 | -2.569480 | 0.173339  | 26                         | 0.000000  | -1.369355 | 0.009465  |
| 1                         | 2.539954  | -1.105199 | -1.175233 | 6                          | 1.173920  | -2.690549 | 0.629181  | 6                          | 1.256471  | -2.275312 | 0.847013  |
| 6                         | -1.553494 | -0.717340 | -1.424257 | 6                          | 0.706068  | 1.310090  | 1.176627  | 6                          | 0.000000  | 0.000000  | 1.406455  |
| 1                         | -2.539954 | -1.105199 | -1.175233 | 8                          | 0.881545  | 2.350211  | 1.443914  | 8                          | 2.063416  | -2.920056 | 1.383598  |
| 6                         | -0.703823 | -1.730064 | -1.950432 | 8                          | 1.309516  | 0.384741  | 2.050009  | 8                          | 0.000000  | 0.000000  | 2.591574  |
| 1                         | -1.182736 | -2.679788 | -2.175628 | 26                         | 1.871286  | 0.800719  | 2.881396  | 26                         | 0.000000  | 1.369355  | 0.009465  |
| 6                         | 0.703823  | -1.730064 | -1.950432 | 6                          | 1.404340  | -1.005032 | 1.805924  | 6                          | -1.256471 | 2.275312  | 0.847013  |
| 1                         | 1.182736  | -2.679788 | -2.175628 | 8                          | 2.165022  | -1.543885 | 2.368105  | 8                          | -2.063416 | 2.920056  | 1.383598  |
| 26                        | 0.000000  | -1.387894 | 0.003591  | 6                          | 1.924051  | 0.036965  | 0.042517  | 6                          | -1.256471 | -2.275312 | 0.847013  |
| 6                         | 1.258875  | -2.287869 | 0.852500  | 6                          | 2.971571  | -1.128819 | -0.749001 | 6                          | 1.256471  | 2.275312  | 0.847013  |
| 6                         | 0.000000  | 0.000000  | 1.405720  | 8                          | 3.687909  | -1.899418 | -1.256183 | 8                          | 2.063416  | 2.920056  | 1.383598  |
| 8                         | 2.067907  | -2.925103 | 1.394139  | 8                          | -3.166340 | -1.034603 | -0.582324 | 8                          | -2.063416 | -2.920056 | 1.383598  |
| 8                         | 0.000000  | 0.000000  | 2.587807  | 1                          | 3.076426  | 1.301240  | -0.410051 | 1                          | 2.088663  | -2.009885 | -1.719999 |
| 6                         | 1.258875  | 2.287869  | 0.852500  | 1                          | -2.146110 | 0.261262  | 1.577429  | 1                          | 2.532438  | 0.000000  | -0.766152 |
| 6                         | -1.258875 | -2.287869 | 0.852500  | 1                          | 3.884225  | 2.086305  | -0.712736 | 1                          | 0.000000  | -2.922662 | -2.391896 |
| 8                         | -2.067907 | -2.925103 | 1.394139  | 1                          | -4.061634 | -1.726178 | -0.844246 | 1                          | -2.088663 | -2.009885 | -1.719999 |
| 8                         | 2.067907  | 2.925103  | 1.394139  | 1                          | -2.327617 | 0.362821  | 2.718470  | 1                          | -2.532438 | 0.000000  | -0.766152 |
| 26                        | 0.000000  | 1.387894  | 0.003591  | 1                          | -1.798886 | 0.029026  | -0.175935 | 1                          | 2.088663  | 2.009885  | -1.719999 |
| 6                         | -1.258875 | 2.287869  | 0.852500  | 1                          | -2.619605 | 1.431215  | -0.963999 | 1                          | 0.000000  | 2.922662  | -2.391896 |
| 8                         | -2.067907 | 2.925103  | 1.394139  | 1                          | -3.141624 | 2.346601  | -1.452519 | 1                          | -2.088663 | 2.009885  | -1.719999 |

| 5-cis-T(C <sub>2v</sub> ) |           |           |           | 5-trans-T(C <sub>1</sub> ) |           |           |           |
|---------------------------|-----------|-----------|-----------|----------------------------|-----------|-----------|-----------|
|                           | x         | y         | z         |                            | xy        |           | z         |
| 6                         | -2.036858 | 0.352451  | 1.725814  | 6                          | 0.502164  | 1.197922  | -1.044695 |
| 6                         | -1.753888 | -1.027749 | 1.718626  | 6                          | -0.080490 | -0.105052 | -0.983241 |
| 6                         | -1.111896 | -1.807922 | 0.720372  | 6                          | -0.094763 | -1.018966 | 0.148411  |
| 6                         | -2.168409 | 1.339336  | 0.688589  | 6                          | 0.316880  | 2.308973  | -0.137615 |
| 6                         | -2.168409 | 1.339336  | -0.688589 | 6                          | -0.592526 | 2.451732  | 0.857736  |
| 1                         | -2.292526 | 0.737925  | 2.710695  | 1                          | 0.796777  | 1.497730  | -2.050201 |
| 1                         | -1.804766 | -1.502567 | 2.695748  | 1                          | -0.093074 | -0.626327 | -1.938696 |
| 1                         | -0.725356 | -2.745871 | 1.115576  | 1                          | -0.086282 | -2.063159 | -0.160366 |
| 1                         | -2.265587 | 2.340004  | 1.108121  | 1                          | 0.932870  | 3.178150  | -0.362177 |
| 1                         | -2.265587 | 2.340004  | -1.108121 | 1                          | -0.646778 | 3.449558  | 1.294191  |
| 6                         | -1.111896 | -1.807922 | -0.720372 | 6                          | -0.720038 | -0.876899 | 1.457086  |
| 1                         | -0.725356 | -2.745871 | -1.115576 | 1                          | -0.746836 | -1.794604 | 2.039336  |
| 6                         | -1.753888 | -1.027749 | -1.718626 | 6                          | -1.336326 | 0.246515  | 2.033429  |
| 1                         | -1.804766 | -1.502567 | -2.695748 | 1                          | -1.920359 | 0.022390  | 2.925655  |
| 6                         | -2.036858 | 0.352451  | -1.725814 | 6                          | -1.557141 | 1.524777  | 1.434170  |
| 1                         | -2.292526 | 0.737925  | -2.710695 | 1                          | -2.352420 | 2.062226  | 1.952670  |
| 26                        | 0.087087  | -0.099515 | -1.320047 | 26                         | -2.224121 | -0.138592 | 0.198740  |
| 6                         | 0.654456  | 1.496982  | -1.935670 | 6                          | -3.037482 | 0.872908  | -1.018051 |
| 6                         | 1.567055  | 0.084578  | 0.000000  | 8                          | -3.527744 | 1.548195  | -1.830014 |
| 8                         | 1.039941  | 2.497807  | -2.381537 | 6                          | 3.153579  | 1.112553  | -0.150015 |
| 8                         | 2.735135  | 0.235495  | 0.000000  | 6                          | -3.057898 | -1.668446 | -0.226433 |
| 6                         | 0.654456  | 1.496982  | 1.935670  | 6                          | 2.469775  | -1.028775 | 1.329221  |
| 6                         | 1.039778  | -1.051807 | -2.520357 | 8                          | -3.650860 | -2.640311 | -0.478640 |
| 8                         | 1.640454  | -1.653502 | -3.313621 | 8                          | 3.986169  | 1.921341  | -0.193314 |
| 8                         | 1.039941  | 2.497807  | 2.381537  | 8                          | 2.843102  | -1.615406 | 2.259812  |
| 26                        | 0.087087  | -0.099515 | 1.320047  | 26                         | 1.863963  | -0.134684 | -0.115550 |
| 6                         | 1.039778  | -1.051807 | 2.520357  | 6                          | 2.603985  | -1.216237 | -1.409922 |
| 8                         | 1.640454  | -1.653502 | 3.313621  | 8                          | 3.107069  | -1.892172 | -2.208320 |



| 4-cis-S(C <sub>2</sub> ) |           |           |           | 4-trans-S(C <sub>2</sub> ) |           |           |           |
|--------------------------|-----------|-----------|-----------|----------------------------|-----------|-----------|-----------|
|                          | x         | y         | z         |                            | x         | y         | z         |
| 6                        | -0.261327 | -1.809227 | -2.006427 | 6                          | -1.741424 | -0.597073 | 0.092331  |
| 6                        | 1.035867  | -1.361519 | -1.689781 | 6                          | -0.742262 | -0.019733 | 0.956719  |
| 6                        | 1.502574  | -0.147777 | -1.034436 | 6                          | 0.742262  | 0.019733  | 0.956719  |
| 6                        | -1.447854 | -1.225944 | -1.502614 | 6                          | -1.470762 | -1.099258 | -1.197626 |
| 6                        | -1.502574 | 0.147777  | -1.034436 | 6                          | -0.206382 | -0.720592 | -1.726839 |
| 1                        | -0.331593 | -2.827843 | -2.381189 | 1                          | -2.708158 | -0.759243 | 0.562252  |
| 1                        | 1.795749  | -2.137991 | -1.775800 | 1                          | -1.089115 | 0.000489  | 1.988720  |
| 1                        | 2.453418  | -0.345504 | -0.537829 | 1                          | 1.089115  | -0.000489 | 1.988720  |
| 1                        | -2.373422 | -1.792354 | -1.568399 | 1                          | -2.185079 | -1.762034 | -1.680235 |
| 1                        | -2.453418 | 0.345504  | -0.537829 | 1                          | 0.105922  | -1.243750 | -2.635587 |
| 6                        | 1.447854  | 1.225944  | -1.502614 | 6                          | 1.741424  | 0.597073  | 0.092331  |
| 1                        | 2.373422  | 1.792354  | -1.568399 | 1                          | 2.708158  | 0.759243  | 0.562252  |
| 6                        | 0.261327  | 1.809227  | -2.006427 | 6                          | 1.470762  | 1.099258  | -1.197626 |
| 1                        | 0.331593  | 2.827843  | -2.381189 | 1                          | 2.185079  | 1.762034  | -1.680235 |
| 6                        | -1.035867 | 1.361519  | -1.689781 | 6                          | 0.206382  | 0.720592  | -1.726839 |
| 1                        | -1.795749 | 2.137991  | -1.775800 | 1                          | -0.105922 | 1.243750  | -2.635587 |
| 26                       | 0.154321  | 1.287337  | 0.048720  | 26                         | 0.024662  | 1.809554  | 0.059588  |
| 6                        | -0.354510 | 2.870960  | 0.644727  | 6                          | -0.456300 | 3.234118  | -0.851676 |
| 6                        | 1.035867  | 1.069669  | 1.565843  | 8                          | -0.754856 | 4.178954  | -1.466457 |
| 8                        | -0.647654 | 3.915804  | 1.072867  | 6                          | 0.456300  | -3.234118 | -0.851676 |
| 8                        | 1.620883  | 0.963633  | 2.568713  | 6                          | 0.262903  | 2.832740  | 1.502765  |
| 6                        | -1.035867 | -1.069669 | 1.565843  | 8                          | 0.456300  | 3.536643  | 2.411645  |
| 8                        | -1.620883 | -0.963633 | 2.568713  | 8                          | 0.754856  | -4.178954 | -1.466457 |
| 26                       | -0.154321 | -1.287337 | 0.048720  | 26                         | -0.024662 | -1.809554 | 0.059588  |
| 6                        | 0.354510  | -2.870960 | 0.644727  | 6                          | -0.262903 | -2.832740 | 1.502765  |
| 8                        | 0.647654  | -3.915804 | 1.072867  | 8                          | -0.456300 | -3.536643 | 2.411645  |

| 4-cis-T(C <sub>2</sub> ) |           |           |           | 4-trans-T(C <sub>2</sub> ) |           |           |           |
|--------------------------|-----------|-----------|-----------|----------------------------|-----------|-----------|-----------|
|                          | x         | y         | z         |                            | x         | y         | z         |
| 6                        | -0.591356 | -1.796671 | -2.013341 | 6                          | 0.386544  | 1.652166  | -1.204013 |
| 6                        | 0.786133  | -1.642714 | -1.697320 | 6                          | 0.189738  | 0.654606  | -2.233798 |
| 6                        | 1.462135  | -0.489717 | -1.181762 | 6                          | -0.189738 | -0.654606 | -2.233798 |
| 6                        | -1.587621 | -0.897730 | -1.619262 | 6                          | -0.029232 | 1.722902  | 0.154641  |
| 6                        | -1.462135 | 0.489717  | -1.181762 | 6                          | 0.029232  | 0.731408  | 1.167284  |
| 1                        | -0.912134 | -2.783823 | -2.334695 | 1                          | 0.554063  | 2.640656  | -1.628975 |
| 1                        | 1.373832  | -2.558141 | -1.710971 | 1                          | 0.355681  | 1.061570  | -3.230079 |
| 1                        | 2.391521  | -0.794011 | -0.698973 | 1                          | -0.355681 | -1.061570 | -3.230079 |
| 1                        | -2.608510 | -1.273235 | -1.630736 | 1                          | -0.114626 | 2.735129  | 0.549502  |
| 1                        | -2.391521 | 0.794011  | -0.698973 | 1                          | -0.135152 | 1.129457  | 2.166525  |
| 6                        | 1.587621  | 0.897730  | -1.619262 | 6                          | -0.386544 | -1.652166 | -1.204013 |
| 1                        | 2.608510  | 1.273235  | -1.630736 | 1                          | -0.554063 | -2.640656 | -1.628975 |
| 6                        | 0.591356  | 1.796671  | -2.013341 | 6                          | 0.029232  | -1.722902 | 0.154641  |
| 1                        | 0.912134  | 2.783823  | -2.334695 | 1                          | 0.114626  | -2.735129 | 0.549502  |
| 6                        | -0.786133 | 1.642714  | -1.697320 | 6                          | -0.029232 | -0.731408 | 1.167284  |
| 1                        | -1.373832 | 2.558141  | -1.710971 | 1                          | 0.135152  | -1.129457 | 2.166525  |
| 26                       | 0.301493  | 1.211719  | 0.053378  | 26                         | -1.895314 | -1.021850 | 0.194320  |
| 6                        | -0.370742 | 2.602700  | 0.950205  | 6                          | -2.890539 | -0.538321 | 1.592558  |
| 6                        | 1.459524  | 0.896405  | 1.360055  | 8                          | -3.539371 | -0.252904 | 2.518062  |
| 8                        | -0.786133 | 3.508526  | 1.553941  | 6                          | 2.890539  | 0.538321  | 1.592558  |
| 8                        | 2.221385  | 0.699121  | 2.220573  | 6                          | -3.230989 | -1.145820 | -0.979507 |
| 6                        | -1.459524 | -0.896405 | 1.360055  | 8                          | -4.096535 | -1.226789 | -1.754597 |
| 8                        | -2.221385 | -0.699121 | 2.220573  | 8                          | 3.539371  | 0.252904  | 2.518062  |
| 26                       | -0.301493 | -1.211719 | 0.053378  | 26                         | 1.895314  | 1.021850  | 0.194320  |
| 6                        | 0.370742  | -2.602700 | 0.950205  | 6                          | 3.230989  | 1.145820  | -0.979507 |
| 8                        | 0.786133  | -3.508526 | 1.553941  | 8                          | 4.096535  | 1.226789  | -1.754597 |

| 3-cis-S( $C_{2v}$ ) |           |           |           | 3-trans-S( $C_s$ ) |           |           |           |
|---------------------|-----------|-----------|-----------|--------------------|-----------|-----------|-----------|
|                     | x         | y         | z         |                    | x         | y         | z         |
| 6                   | 1.338389  | -1.271651 | -1.466702 | 6                  | -1.064279 | -0.149474 | 0.822944  |
| 6                   | 1.902960  | 0.000000  | -1.761858 | 6                  | -1.064279 | -0.149474 | -0.822944 |
| 6                   | 1.338389  | 1.271651  | -1.466702 | 6                  | 0.018482  | 0.271360  | -1.710331 |
| 6                   | 0.000000  | -1.623101 | -1.088133 | 6                  | 0.018482  | 0.271360  | 1.710331  |
| 6                   | -1.338389 | -1.271651 | -1.466702 | 6                  | 1.277189  | -0.302090 | 1.385435  |
| 1                   | 2.057792  | -2.087429 | -1.426608 | 1                  | -2.040903 | 0.240486  | 1.112661  |
| 1                   | 2.963740  | 0.000000  | -2.000708 | 1                  | -2.040903 | 0.240486  | -1.112661 |
| 1                   | 2.057792  | 2.087429  | -1.426608 | 1                  | -0.181914 | 0.856045  | -2.605471 |
| 1                   | 0.000000  | -2.614409 | -0.632333 | 1                  | -0.181914 | 0.856045  | 2.605471  |
| 1                   | -2.057792 | -2.087429 | -1.426608 | 1                  | 2.137279  | -0.079973 | 2.016782  |
| 6                   | 0.000000  | 1.623101  | -1.088133 | 6                  | 1.277189  | -0.302090 | -1.385435 |
| 1                   | 0.000000  | 2.614409  | -0.632333 | 1                  | 2.137279  | -0.079973 | -2.016782 |
| 6                   | -1.338389 | 1.271651  | -1.466702 | 6                  | 1.277189  | -1.617327 | -0.685426 |
| 1                   | -2.057792 | 2.087429  | -1.426608 | 1                  | 1.412777  | -2.547047 | -1.254570 |
| 6                   | -1.902960 | 0.000000  | -1.761858 | 6                  | 1.277189  | -1.617327 | 0.685426  |
| 1                   | -2.963740 | 0.000000  | -2.000708 | 1                  | 1.412777  | -2.547047 | 1.254570  |
| 26                  | -1.121321 | 0.000000  | 0.120770  | 26                 | -0.812380 | -1.878439 | 0.000000  |
| 6                   | -2.620309 | 0.000000  | 1.067671  | 6                  | 2.110693  | 1.957045  | 0.000000  |
| 6                   | 0.000000  | 0.000000  | 1.736119  | 6                  | -2.528633 | -2.231022 | 0.000000  |
| 8                   | -3.587459 | 0.000000  | 1.723239  | 8                  | -3.681369 | -2.424203 | 0.000000  |
| 8                   | 0.000000  | 0.000000  | 2.911581  | 8                  | 3.139674  | 2.509433  | 0.000000  |
| 26                  | 1.121321  | 0.000000  | 0.120770  | 26                 | 0.586804  | 1.100127  | 0.000000  |
| 6                   | 2.620309  | 0.000000  | 1.067671  | 6                  | -0.286500 | 2.672986  | 0.000000  |
| 8                   | 3.587459  | 0.000000  | 1.723239  | 8                  | -0.791534 | 3.723945  | 0.000000  |

| 3-cis-T(C <sub>s</sub> ) |           |           |           | 3-trans-T(C <sub>s</sub> ) |           |           |           |
|--------------------------|-----------|-----------|-----------|----------------------------|-----------|-----------|-----------|
|                          | x         | y         | z         |                            | x         | y         | z         |
| 6                        | 1.805831  | -1.025894 | 1.328101  | 6                          | -1.147585 | 0.081027  | 0.757212  |
| 6                        | 1.832682  | 0.260963  | 1.883408  | 6                          | -1.147585 | 0.081027  | -0.757212 |
| 6                        | 1.193621  | 1.405823  | 1.322879  | 6                          | -0.039368 | 0.317644  | -1.673770 |
| 6                        | 1.378427  | -1.422738 | 0.000000  | 6                          | -0.039368 | 0.317644  | 1.673770  |
| 6                        | 1.805831  | -1.025894 | -1.328101 | 6                          | 1.203988  | -0.302708 | 1.370399  |
| 1                        | 2.014431  | -1.842341 | 2.018305  | 1                          | -2.099939 | 0.476994  | 1.107001  |
| 1                        | 2.132004  | 0.338161  | 2.925471  | 1                          | -2.099939 | 0.476994  | -1.107001 |
| 1                        | 0.959256  | 2.183462  | 2.047017  | 1                          | -0.242329 | 0.841289  | -2.605753 |
| 1                        | 1.149043  | -2.490454 | 0.000000  | 1                          | -0.242329 | 0.841289  | 2.605753  |
| 1                        | 2.014431  | -1.842341 | -2.018305 | 1                          | 2.030474  | -0.115278 | 2.056390  |
| 6                        | 0.742655  | 1.688095  | 0.000000  | 6                          | 1.203988  | -0.302708 | -1.370399 |
| 1                        | 0.069549  | 2.545032  | 0.000000  | 1                          | 2.030474  | -0.115278 | -2.056390 |
| 6                        | 1.193621  | 1.405823  | -1.322879 | 6                          | 1.203988  | -1.624487 | -0.683779 |
| 1                        | 0.959256  | 2.183462  | -2.047017 | 1                          | 1.343033  | -2.544344 | -1.261815 |
| 6                        | 1.832682  | 0.260963  | -1.883408 | 6                          | 1.203988  | -1.624487 | 0.683779  |
| 1                        | 2.132004  | 0.338161  | -2.925471 | 1                          | 1.343033  | -2.544344 | 1.261815  |
| 26                       | -0.118587 | -0.226452 | -1.223142 | 26                         | -0.930222 | -1.839392 | 0.000000  |
| 6                        | -1.172582 | 0.182745  | -2.599602 | 6                          | 2.221895  | 1.884194  | 0.000000  |
| 6                        | -1.623177 | -0.446946 | 0.000000  | 6                          | -2.556089 | -2.623167 | 0.000000  |
| 8                        | -1.864438 | 0.423048  | -3.508874 | 8                          | -3.627297 | -3.097510 | 0.000000  |
| 8                        | -2.791811 | -0.650064 | 0.000000  | 8                          | 3.294642  | 2.343635  | 0.000000  |
| 26                       | -0.118587 | -0.226452 | 1.223142  | 26                         | 0.621688  | 1.180179  | 0.000000  |
| 6                        | -1.172582 | 0.182745  | 2.599602  | 6                          | -0.076567 | 2.841868  | 0.000000  |
| 8                        | -1.864438 | 0.423048  | 3.508874  | 8                          | -0.445881 | 3.947269  | 0.000000  |

Table S4. Harmonic vibrational frequencies of the  $(C_8H_8)Fe_2(CO)_n$  ( $n = 8, 7, 6, 5, 4, 3$ ) structures (Table S4) by the M06Lmethod.

| $C_8H_8Fe(CO)_3-S(C_{2v})$ |      |      | $C_8H_8Fe(CO)_3-T(C_s)$ |      |      |
|----------------------------|------|------|-------------------------|------|------|
| 43                         | 72   | 74   | 13                      | 53   | 66   |
| 82                         | 92   | 95   | 67                      | 80   | 84   |
| 128                        | 166  | 264  | 107                     | 120  | 186  |
| 268                        | 327  | 328  | 257                     | 306  | 313  |
| 389                        | 391  | 397  | 316                     | 338  | 377  |
| 457                        | 459  | 485  | 391                     | 426  | 449  |
| 498                        | 499  | 544  | 459                     | 470  | 506  |
| 567                        | 597  | 615  | 524                     | 545  | 566  |
| 634                        | 713  | 717  | 590                     | 676  | 732  |
| 746                        | 802  | 822  | 736                     | 746  | 772  |
| 872                        | 872  | 905  | 827                     | 870  | 878  |
| 936                        | 939  | 963  | 916                     | 918  | 947  |
| 980                        | 1001 | 1010 | 949                     | 962  | 984  |
| 1151                       | 1202 | 1273 | 1187                    | 1198 | 1280 |
| 1316                       | 1334 | 1393 | 1307                    | 1327 | 1368 |
| 1435                       | 1462 | 1504 | 1402                    | 1453 | 1463 |
| 1509                       | 1537 | 1625 | 1503                    | 1529 | 1557 |
| 1672                       | 2044 | 2057 | 1592                    | 2033 | 2044 |
| 2107                       | 3121 | 3122 | 2096                    | 3133 | 3138 |
| 3139                       | 3143 | 3154 | 3140                    | 3150 | 3151 |
| 3159                       | 3169 | 3174 | 3164                    | 3166 | 3172 |

| 8-cis-S(C <sub>2v</sub> ) |      |      | 8-trans-S(C <sub>1</sub> ) |      |      | 8-cis-T(C <sub>1</sub> ) |      |      | 8-trans-T(C <sub>2</sub> ) |      |      |
|---------------------------|------|------|----------------------------|------|------|--------------------------|------|------|----------------------------|------|------|
| 26                        | 31   | 34   | 23                         | 28   | 30   | 18                       | 25   | 28   | 23                         | 27   | 30   |
| 39                        | 55   | 56   | 43                         | 51   | 60   | 31                       | 38   | 42   | 43                         | 51   | 52   |
| 60                        | 65   | 70   | 67                         | 71   | 78   | 55                       | 59   | 61   | 61                         | 63   | 72   |
| 86                        | 87   | 89   | 84                         | 87   | 95   | 68                       | 71   | 76   | 84                         | 86   | 86   |
| 90                        | 97   | 100  | 99                         | 106  | 115  | 79                       | 84   | 88   | 89                         | 93   | 93   |
| 110                       | 118  | 145  | 120                        | 127  | 141  | 89                       | 91   | 106  | 99                         | 105  | 110  |
| 154                       | 166  | 166  | 166                        | 205  | 221  | 121                      | 131  | 154  | 114                        | 118  | 160  |
| 257                       | 262  | 269  | 249                        | 302  | 309  | 165                      | 280  | 284  | 202                        | 293  | 317  |
| 344                       | 374  | 384  | 317                        | 327  | 343  | 306                      | 320  | 324  | 322                        | 322  | 358  |
| 386                       | 402  | 404  | 381                        | 392  | 402  | 327                      | 343  | 348  | 359                        | 369  | 369  |
| 422                       | 427  | 435  | 421                        | 426  | 432  | 387                      | 397  | 407  | 393                        | 394  | 414  |
| 438                       | 448  | 452  | 440                        | 447  | 456  | 411                      | 418  | 422  | 417                        | 434  | 436  |
| 468                       | 469  | 471  | 461                        | 477  | 481  | 436                      | 455  | 461  | 443                        | 444  | 460  |
| 479                       | 482  | 489  | 483                        | 507  | 517  | 464                      | 478  | 485  | 460                        | 471  | 472  |
| 513                       | 516  | 562  | 534                        | 548  | 555  | 496                      | 499  | 501  | 490                        | 492  | 545  |
| 563                       | 597  | 598  | 560                        | 587  | 591  | 510                      | 522  | 527  | 547                        | 564  | 570  |
| 620                       | 639  | 644  | 613                        | 627  | 632  | 560                      | 590  | 631  | 570                        | 608  | 613  |
| 649                       | 650  | 658  | 643                        | 713  | 732  | 643                      | 645  | 687  | 618                        | 625  | 697  |
| 702                       | 703  | 790  | 761                        | 767  | 831  | 690                      | 725  | 773  | 732                        | 737  | 745  |
| 802                       | 804  | 868  | 845                        | 858  | 867  | 806                      | 835  | 873  | 746                        | 810  | 847  |
| 871                       | 884  | 921  | 872                        | 920  | 934  | 880                      | 909  | 940  | 851                        | 877  | 879  |
| 947                       | 984  | 989  | 956                        | 969  | 998  | 974                      | 983  | 993  | 906                        | 933  | 947  |
| 1016                      | 1095 | 1200 | 1003                       | 1154 | 1211 | 996                      | 1111 | 1225 | 984                        | 1184 | 1190 |
| 1220                      | 1251 | 1274 | 1295                       | 1323 | 1341 | 1276                     | 1306 | 1308 | 1315                       | 1324 | 1327 |
| 1351                      | 1393 | 1417 | 1397                       | 1433 | 1459 | 1380                     | 1426 | 1439 | 1403                       | 1450 | 1455 |
| 1449                      | 1527 | 1531 | 1496                       | 1536 | 1538 | 1483                     | 1534 | 1655 | 1467                       | 1509 | 1512 |
| 1688                      | 1691 | 2047 | 1548                       | 1666 | 1778 | 1682                     | 1686 | 2039 | 1537                       | 1546 | 2048 |
| 2049                      | 2065 | 2066 | 1898                       | 2053 | 2055 | 2040                     | 2048 | 2060 | 2050                       | 2065 | 2065 |
| 2069                      | 2087 | 2131 | 2072                       | 2076 | 2092 | 2077                     | 2088 | 2121 | 2075                       | 2077 | 2117 |
| 2149                      | 3118 | 3118 | 2135                       | 3133 | 3134 | 2144                     | 3112 | 3116 | 2132                       | 3131 | 3136 |
| 3125                      | 3127 | 3133 | 3147                       | 3152 | 3164 | 3123                     | 3129 | 3131 | 3136                       | 3148 | 3148 |
| 3136                      | 3148 | 3151 | 3170                       | 3175 | 3187 | 3141                     | 3149 | 3156 | 3160                       | 3163 | 3169 |

| 7-cis-S(C <sub>1</sub> ) |      |      | 7-trans-S(C <sub>1</sub> ) |      |      | 7-cis-T(C <sub>s</sub> ) |      |      | 7-trans-T(C <sub>1</sub> ) |      |      |
|--------------------------|------|------|----------------------------|------|------|--------------------------|------|------|----------------------------|------|------|
| 18                       | 29   | 41   | 29                         | 31   | 43   | 13                       | 32   | 37   | 29                         | 29   | 37   |
| 48                       | 60   | 62   | 52                         | 56   | 67   | 42                       | 53   | 60   | 47                         | 57   | 64   |
| 75                       | 83   | 84   | 73                         | 77   | 81   | 61                       | 63   | 69   | 66                         | 69   | 76   |
| 87                       | 91   | 96   | 86                         | 90   | 99   | 78                       | 86   | 87   | 83                         | 86   | 87   |
| 105                      | 116  | 134  | 107                        | 114  | 118  | 93                       | 96   | 110  | 95                         | 96   | 109  |
| 142                      | 161  | 208  | 140                        | 143  | 181  | 122                      | 125  | 156  | 114                        | 124  | 131  |
| 254                      | 292  | 325  | 274                        | 287  | 308  | 167                      | 252  | 268  | 192                        | 259  | 290  |
| 340                      | 349  | 386  | 338                        | 360  | 380  | 281                      | 317  | 322  | 318                        | 325  | 346  |
| 401                      | 402  | 420  | 392                        | 398  | 405  | 346                      | 366  | 375  | 349                        | 378  | 383  |
| 429                      | 433  | 447  | 425                        | 433  | 442  | 384                      | 397  | 399  | 386                        | 402  | 413  |
| 449                      | 462  | 464  | 453                        | 458  | 461  | 419                      | 430  | 435  | 420                        | 429  | 446  |
| 470                      | 478  | 488  | 467                        | 480  | 482  | 436                      | 450  | 462  | 452                        | 456  | 468  |
| 499                      | 504  | 519  | 487                        | 500  | 502  | 468                      | 477  | 493  | 473                        | 478  | 492  |
| 552                      | 562  | 573  | 546                        | 561  | 570  | 499                      | 520  | 528  | 518                        | 523  | 553  |
| 600                      | 608  | 615  | 595                        | 607  | 616  | 539                      | 560  | 592  | 556                        | 562  | 583  |
| 639                      | 646  | 656  | 622                        | 641  | 649  | 631                      | 635  | 643  | 601                        | 624  | 637  |
| 683                      | 740  | 761  | 700                        | 730  | 768  | 659                      | 699  | 714  | 693                        | 726  | 739  |
| 783                      | 839  | 856  | 782                        | 838  | 852  | 780                      | 796  | 811  | 748                        | 805  | 825  |
| 877                      | 895  | 928  | 879                        | 882  | 934  | 861                      | 869  | 913  | 855                        | 864  | 888  |
| 941                      | 971  | 979  | 943                        | 966  | 971  | 916                      | 949  | 968  | 918                        | 934  | 954  |
| 1006                     | 1057 | 1121 | 1004                       | 1019 | 1145 | 976                      | 981  | 1097 | 961                        | 989  | 1171 |
| 1154                     | 1237 | 1248 | 1184                       | 1262 | 1308 | 1203                     | 1243 | 1262 | 1199                       | 1300 | 1317 |
| 1306                     | 1368 | 1388 | 1324                       | 1389 | 1420 | 1287                     | 1363 | 1406 | 1324                       | 1396 | 1438 |
| 1422                     | 1450 | 1489 | 1455                       | 1481 | 1495 | 1429                     | 1466 | 1530 | 1442                       | 1460 | 1509 |
| 1516                     | 1542 | 1681 | 1538                       | 1549 | 1674 | 1584                     | 1646 | 1653 | 1532                       | 1556 | 1565 |
| 2045                     | 2051 | 2056 | 2044                       | 2049 | 2056 | 2014                     | 2023 | 2056 | 2030                       | 2034 | 2054 |
| 2063                     | 2080 | 2108 | 2062                       | 2067 | 2103 | 2072                     | 2078 | 2086 | 2071                       | 2078 | 2089 |
| 2141                     | 3085 | 3097 | 2131                       | 3114 | 3120 | 2143                     | 3116 | 3128 | 2133                       | 3128 | 3133 |
| 3116                     | 3137 | 3145 | 3139                       | 3142 | 3154 | 3131                     | 3134 | 3145 | 3137                       | 3146 | 3147 |
| 3147                     | 3160 | 3162 | 3157                       | 3168 | 3171 | 3151                     | 3153 | 3164 | 3156                       | 3161 | 3172 |

| 6-cis-S(C <sub>s</sub> ) |      |      | 6-trans-S(C <sub>i</sub> ) |      |      | 6-cis-T(C <sub>s</sub> ) |      |      | 6-trans-T(C <sub>2</sub> ) |      |      |
|--------------------------|------|------|----------------------------|------|------|--------------------------|------|------|----------------------------|------|------|
| 14i                      | 44   | 59   | 32                         | 52   | 53   | 16i                      | 46   | 46   | 2i                         | 14   | 43   |
| 59                       | 69   | 82   | 61                         | 73   | 77   | 56                       | 56   | 69   | 45                         | 65   | 67   |
| 89                       | 90   | 99   | 77                         | 81   | 86   | 75                       | 85   | 87   | 69                         | 71   | 73   |
| 101                      | 115  | 135  | 100                        | 101  | 110  | 90                       | 97   | 99   | 87                         | 89   | 94   |
| 159                      | 167  | 169  | 156                        | 173  | 173  | 102                      | 126  | 162  | 112                        | 126  | 130  |
| 183                      | 254  | 270  | 313                        | 365  | 370  | 169                      | 241  | 257  | 152                        | 269  | 270  |
| 303                      | 323  | 359  | 380                        | 384  | 410  | 301                      | 330  | 332  | 304                        | 312  | 321  |
| 371                      | 393  | 403  | 419                        | 420  | 430  | 335                      | 341  | 365  | 335                        | 354  | 362  |
| 434                      | 443  | 450  | 441                        | 463  | 464  | 406                      | 410  | 418  | 400                        | 404  | 414  |
| 458                      | 482  | 486  | 467                        | 473  | 483  | 422                      | 430  | 438  | 415                        | 439  | 440  |
| 495                      | 498  | 501  | 484                        | 510  | 511  | 443                      | 444  | 478  | 466                        | 468  | 475  |
| 527                      | 527  | 554  | 517                        | 524  | 563  | 492                      | 499  | 527  | 485                        | 496  | 534  |
| 558                      | 581  | 589  | 576                        | 606  | 607  | 528                      | 556  | 557  | 540                        | 552  | 562  |
| 597                      | 613  | 620  | 622                        | 624  | 626  | 564                      | 566  | 586  | 563                        | 578  | 600  |
| 644                      | 704  | 739  | 642                        | 663  | 789  | 645                      | 712  | 727  | 624                        | 723  | 724  |
| 744                      | 780  | 860  | 810                        | 813  | 835  | 753                      | 794  | 839  | 759                        | 773  | 825  |
| 874                      | 897  | 901  | 874                        | 886  | 930  | 851                      | 865  | 898  | 864                        | 869  | 909  |
| 936                      | 942  | 952  | 937                        | 957  | 989  | 919                      | 923  | 943  | 918                        | 928  | 947  |
| 968                      | 993  | 1021 | 1016                       | 1029 | 1048 | 944                      | 980  | 997  | 963                        | 985  | 1000 |
| 1178                     | 1199 | 1308 | 1124                       | 1127 | 1189 | 1160                     | 1183 | 1280 | 1172                       | 1193 | 1300 |
| 1318                     | 1327 | 1398 | 1267                       | 1274 | 1362 | 1295                     | 1322 | 1383 | 1305                       | 1334 | 1393 |
| 1443                     | 1450 | 1505 | 1383                       | 1418 | 1436 | 1421                     | 1451 | 1490 | 1430                       | 1454 | 1496 |
| 1520                     | 1554 | 1560 | 1460                       | 1476 | 1517 | 1516                     | 1539 | 1549 | 1513                       | 1540 | 1548 |
| 1676                     | 2026 | 2029 | 1525                       | 2049 | 2050 | 1626                     | 2026 | 2029 | 1649                       | 2034 | 2037 |
| 2047                     | 2066 | 2070 | 2051                       | 2052 | 2102 | 2039                     | 2059 | 2074 | 2043                       | 2045 | 2088 |
| 2118                     | 3130 | 3132 | 2114                       | 3085 | 3085 | 2110                     | 3139 | 3141 | 2106                       | 3141 | 3146 |
| 3142                     | 3151 | 3151 | 3103                       | 3105 | 3157 | 3151                     | 3156 | 3158 | 3149                       | 3157 | 3157 |
| 3160                     | 3166 | 3173 | 3157                       | 3173 | 3173 | 3166                     | 3172 | 3176 | 3170                       | 3174 | 3177 |



| 5-cis-S(C <sub>2v</sub> ) |      |      | 5-cis-S'(C <sub>2v</sub> ) |      |      | 5-trans-S(C <sub>1</sub> ) |      |      | 5-cis-T(C <sub>2v</sub> ) |      |      | 5-trans-T(C <sub>1</sub> ) |      |      |
|---------------------------|------|------|----------------------------|------|------|----------------------------|------|------|---------------------------|------|------|----------------------------|------|------|
| 30                        | 52   | 65   | -44                        | 4    | 66   | 40                         | 51   | 58   | 25                        | 41   | 56   | 21                         | 42   | 49   |
| 72                        | 86   | 87   | 67                         | 73   | 88   | 66                         | 76   | 80   | 59                        | 62   | 75   | 55                         | 66   | 71   |
| 90                        | 98   | 105  | 92                         | 92   | 107  | 83                         | 92   | 101  | 75                        | 84   | 100  | 73                         | 82   | 90   |
| 118                       | 159  | 202  | 118                        | 119  | 211  | 111                        | 168  | 180  | 101                       | 134  | 136  | 93                         | 118  | 136  |
| 250                       | 263  | 278  | 247                        | 253  | 255  | 187                        | 225  | 286  | 194                       | 196  | 244  | 142                        | 177  | 245  |
| 312                       | 329  | 338  | 274                        | 310  | 341  | 295                        | 334  | 374  | 267                       | 292  | 305  | 304                        | 316  | 326  |
| 350                       | 383  | 415  | 356                        | 394  | 416  | 390                        | 409  | 418  | 335                       | 355  | 356  | 337                        | 351  | 366  |
| 417                       | 428  | 446  | 429                        | 452  | 468  | 436                        | 452  | 460  | 377                       | 402  | 402  | 397                        | 411  | 417  |
| 452                       | 473  | 500  | 478                        | 485  | 501  | 470                        | 475  | 478  | 424                       | 426  | 438  | 451                        | 452  | 466  |
| 502                       | 508  | 516  | 502                        | 514  | 526  | 491                        | 507  | 510  | 450                       | 462  | 465  | 473                        | 483  | 485  |
| 534                       | 549  | 582  | 538                        | 541  | 571  | 540                        | 551  | 557  | 482                       | 486  | 530  | 497                        | 525  | 539  |
| 592                       | 609  | 629  | 579                        | 596  | 639  | 580                        | 595  | 613  | 536                       | 550  | 570  | 542                        | 566  | 585  |
| 635                       | 647  | 708  | 654                        | 659  | 691  | 623                        | 642  | 675  | 580                       | 611  | 721  | 608                        | 622  | 674  |
| 750                       | 806  | 827  | 780                        | 813  | 831  | 758                        | 794  | 824  | 738                       | 745  | 785  | 730                        | 778  | 815  |
| 845                       | 874  | 894  | 842                        | 872  | 884  | 837                        | 851  | 875  | 839                       | 853  | 878  | 827                        | 860  | 894  |
| 895                       | 927  | 932  | 887                        | 916  | 935  | 897                        | 933  | 947  | 906                       | 906  | 932  | 898                        | 913  | 935  |
| 952                       | 952  | 1004 | 937                        | 979  | 997  | 973                        | 985  | 1021 | 943                       | 957  | 965  | 956                        | 975  | 990  |
| 1006                      | 1164 | 1167 | 1009                       | 1144 | 1164 | 1027                       | 1108 | 1121 | 991                       | 1171 | 1202 | 1002                       | 1135 | 1171 |
| 1258                      | 1306 | 1333 | 1237                       | 1276 | 1310 | 1182                       | 1256 | 1300 | 1299                      | 1314 | 1342 | 1262                       | 1266 | 1285 |
| 1383                      | 1426 | 1466 | 1376                       | 1411 | 1454 | 1326                       | 1378 | 1393 | 1394                      | 1439 | 1461 | 1372                       | 1414 | 1430 |
| 1529                      | 1533 | 1548 | 1517                       | 1523 | 1536 | 1417                       | 1451 | 1471 | 1522                      | 1526 | 1563 | 1449                       | 1482 | 1500 |
| 1556                      | 1577 | 1906 | 1549                       | 1563 | 1894 | 1536                       | 1566 | 2014 | 1567                      | 1606 | 1918 | 1539                       | 1668 | 2022 |
| 2033                      | 2039 | 2067 | 2032                       | 2038 | 2063 | 2046                       | 2052 | 2059 | 2028                      | 2036 | 2054 | 2036                       | 2043 | 2069 |
| 2095                      | 3142 | 3143 | 2094                       | 3134 | 3134 | 2108                       | 3085 | 3111 | 2091                      | 3142 | 3145 | 2102                       | 3125 | 3140 |
| 3157                      | 3159 | 3171 | 3165                       | 3167 | 3169 | 3115                       | 3150 | 3159 | 3155                      | 3159 | 3164 | 3143                       | 3148 | 3150 |
| 3173                      | 3184 | 3186 | 3171                       | 3197 | 3198 | 3161                       | 3185 | 3194 | 3169                      | 3177 | 3180 | 3163                       | 3172 | 3182 |

| 4-cis-S(C <sub>2</sub> ) |      |      | 4-trans-S(C <sub>2</sub> ) |      |      | 4-cis-T(C <sub>2</sub> ) |      |      | 4-trans-T(C <sub>2</sub> ) |      |      |
|--------------------------|------|------|----------------------------|------|------|--------------------------|------|------|----------------------------|------|------|
| 30                       | 52   | 72   | 47                         | 48   | 56   | 27                       | 45   | 55   | -26                        | -5   | 42   |
| 73                       | 81   | 87   | 64                         | 80   | 87   | 68                       | 77   | 83   | 49                         | 63   | 80   |
| 91                       | 105  | 164  | 99                         | 106  | 150  | 86                       | 108  | 129  | 85                         | 87   | 89   |
| 185                      | 203  | 243  | 177                        | 195  | 289  | 147                      | 209  | 255  | 112                        | 127  | 148  |
| 271                      | 319  | 343  | 296                        | 330  | 364  | 261                      | 293  | 311  | 282                        | 292  | 323  |
| 346                      | 367  | 405  | 379                        | 394  | 420  | 312                      | 326  | 381  | 344                        | 352  | 353  |
| 447                      | 454  | 462  | 434                        | 445  | 458  | 404                      | 435  | 448  | 392                        | 403  | 459  |
| 466                      | 483  | 509  | 472                        | 476  | 486  | 455                      | 467  | 470  | 460                        | 485  | 491  |
| 516                      | 523  | 537  | 499                        | 521  | 542  | 491                      | 494  | 512  | 498                        | 498  | 507  |
| 538                      | 570  | 578  | 543                        | 548  | 588  | 526                      | 529  | 535  | 531                        | 538  | 546  |
| 626                      | 628  | 637  | 597                        | 621  | 636  | 609                      | 611  | 615  | 604                        | 618  | 625  |
| 662                      | 776  | 807  | 647                        | 798  | 804  | 676                      | 765  | 794  | 728                        | 730  | 759  |
| 828                      | 838  | 861  | 829                        | 831  | 856  | 816                      | 818  | 855  | 774                        | 822  | 852  |
| 868                      | 898  | 899  | 901                        | 904  | 906  | 868                      | 872  | 901  | 873                        | 901  | 912  |
| 959                      | 959  | 984  | 953                        | 953  | 981  | 931                      | 932  | 980  | 922                        | 937  | 951  |
| 1009                     | 1029 | 1123 | 989                        | 1031 | 1103 | 999                      | 1014 | 1129 | 978                        | 989  | 1167 |
| 1139                     | 1217 | 1249 | 1121                       | 1169 | 1186 | 1163                     | 1233 | 1268 | 1189                       | 1291 | 1303 |
| 1274                     | 1363 | 1395 | 1285                       | 1325 | 1355 | 1296                     | 1372 | 1400 | 1327                       | 1386 | 1425 |
| 1429                     | 1443 | 1484 | 1395                       | 1420 | 1466 | 1446                     | 1479 | 1495 | 1449                       | 1490 | 1507 |
| 1494                     | 1538 | 1542 | 1470                       | 1513 | 1524 | 1517                     | 1549 | 1560 | 1537                       | 1540 | 1655 |
| 2009                     | 2019 | 2038 | 2018                       | 2019 | 2046 | 2016                     | 2021 | 2040 | 2022                       | 2024 | 2067 |
| 2080                     | 3127 | 3127 | 2076                       | 3089 | 3096 | 2084                     | 3131 | 3131 | 2084                       | 3138 | 3138 |
| 3143                     | 3144 | 3169 | 3137                       | 3147 | 3172 | 3162                     | 3165 | 3168 | 3145                       | 3153 | 3158 |
| 3170                     | 3181 | 3182 | 3172                       | 3190 | 3190 | 3170                     | 3193 | 3194 | 3163                       | 3171 | 3174 |

| 3-cis-S(C <sub>2v</sub> ) |      |      | 3-trans-S(C <sub>s</sub> ) |      |      | 3-cis-T(C <sub>s</sub> ) |      |      | 3-trans-T(C <sub>s</sub> ) |      |      |
|---------------------------|------|------|----------------------------|------|------|--------------------------|------|------|----------------------------|------|------|
| 53                        | 60   | 70   | -30                        | 56   | 57   | 43                       | 55   | 64   | 42                         | 49   | 62   |
| 89                        | 109  | 114  | 82                         | 92   | 94   | 77                       | 91   | 95   | 83                         | 87   | 100  |
| 127                       | 174  | 242  | 192                        | 192  | 223  | 159                      | 215  | 222  | 175                        | 182  | 220  |
| 254                       | 267  | 269  | 266                        | 307  | 312  | 245                      | 264  | 269  | 263                        | 270  | 302  |
| 281                       | 317  | 359  | 360                        | 414  | 435  | 322                      | 327  | 338  | 343                        | 354  | 379  |
| 381                       | 427  | 428  | 439                        | 452  | 462  | 390                      | 394  | 424  | 402                        | 428  | 432  |
| 432                       | 463  | 509  | 469                        | 501  | 511  | 435                      | 441  | 468  | 444                        | 457  | 471  |
| 517                       | 529  | 534  | 513                        | 536  | 551  | 501                      | 510  | 513  | 481                        | 493  | 507  |
| 546                       | 552  | 585  | 563                        | 574  | 605  | 516                      | 537  | 555  | 533                        | 552  | 604  |
| 618                       | 681  | 766  | 620                        | 646  | 717  | 602                      | 674  | 748  | 608                        | 657  | 718  |
| 807                       | 816  | 850  | 732                        | 788  | 803  | 790                      | 804  | 819  | 766                        | 793  | 796  |
| 855                       | 855  | 872  | 816                        | 818  | 890  | 851                      | 852  | 873  | 818                        | 840  | 883  |
| 908                       | 937  | 939  | 893                        | 927  | 952  | 902                      | 926  | 928  | 891                        | 920  | 921  |
| 975                       | 980  | 1009 | 963                        | 971  | 1002 | 974                      | 985  | 1017 | 948                        | 954  | 981  |
| 1148                      | 1153 | 1248 | 1035                       | 1089 | 1118 | 1143                     | 1159 | 1244 | 1035                       | 1115 | 1122 |
| 1278                      | 1305 | 1378 | 1118                       | 1135 | 1256 | 1265                     | 1303 | 1375 | 1144                       | 1199 | 1300 |
| 1415                      | 1451 | 1503 | 1285                       | 1340 | 1344 | 1411                     | 1446 | 1479 | 1307                       | 1355 | 1357 |
| 1513                      | 1526 | 1535 | 1383                       | 1445 | 1454 | 1512                     | 1533 | 1548 | 1403                       | 1448 | 1459 |
| 1548                      | 1942 | 2017 | 1592                       | 2011 | 2018 | 1548                     | 1880 | 2019 | 1601                       | 2006 | 2015 |
| 2043                      | 3126 | 3127 | 2063                       | 3049 | 3073 | 2044                     | 3113 | 3144 | 2067                       | 3088 | 3109 |
| 3154                      | 3157 | 3158 | 3119                       | 3128 | 3148 | 3149                     | 3153 | 3159 | 3138                       | 3141 | 3142 |
| 3161                      | 3179 | 3180 | 3148                       | 3170 | 3170 | 3166                     | 3185 | 3185 | 3149                       | 3165 | 3166 |
